1 **Title**

2 Lipids as currency in ecological interactions: Competition and facilitation between two lipid  
3 scavenging parasitoids

4

5 **Authors**

6 Mark Lammers<sup>1, 2</sup>, Tim A. M. van Gorkum<sup>1</sup>, Stefanie Hoeijmans<sup>1</sup>, Ken Kraaijeveld<sup>1</sup>, Jeffrey A.  
7 Harvey<sup>1, 3</sup>, Jacintha Ellers<sup>1</sup>

8

9 <sup>1</sup> Department of Ecological Science, Vrije Universiteit Amsterdam, De Boelelaan 1085, 1081HV  
10 Amsterdam, the Netherlands

11 <sup>2</sup> Institute of Evolution and Biodiversity, University of Münster, Hüfferstraße 1, 48149 Münster,  
12 Germany

13 <sup>3</sup> Department of Terrestrial Ecology, Netherlands Institute of Ecology, Droevendaalsesteeg 10,  
14 6708PB Wageningen, the Netherlands

15

16 **Keywords**

17 Intrinsic competition, Trophic switch, Coexistence, *Nasonia vitripennis*, *Tachinaephagus zealandicus*,  
18 multiparasitism

19

20 **Abstract**

21 Interspecific interactions in nature often revolve around the acquisition of nutrients. Depending on the  
22 organisms' metabolic requirements, competition for specific essential nutrients may occur, which  
23 selects for increased abilities to monopolize, consume and store these nutrients. Lipid scavengers are  
24 organisms that rely on exogenous lipid acquisition as they lack the ability to synthesize fatty acids *de*  
25 *novo* or in sufficient quantity. Most parasitoid insects are lipid scavengers: they obtain all required  
26 lipids by feeding on their hosts as larvae. Here we study the nutritional ecology of competitive  
27 interactions between native *Nasonia vitripennis* and introduced *Tachinaephagus zealandicus*. While  
28 the former was already known to lack lipogenesis, we show that *T. zealandicus* also relies on host  
29 lipids. The interactions between the two species were studied using competition experiments, in which  
30 oviposition of *T. zealandicus* on a host was followed by multiparasitism by *N. vitripennis*. The  
31 outcome of competition was determined by the duration of the time lag between oviposition events. *N.*  
32 *vitripennis* was superior when arriving 3 days after oviposition by *T. zealandicus*. In contrast, 9 days  
33 after oviposition of *T. zealandicus* we observed complete reversal, and no *N. vitripennis* offspring  
34 were able to develop. Only when *N. vitripennis* laid eggs 15 days after *T. zealandicus* oviposition, both  
35 species could emerge from the same host. However, *N. vitripennis* realizes only 10% of its potential  
36 fitness at this time point because prior parasitization by the gregarious *T. zealandicus*

37 compartmentalizes the host resources, limiting the spread of *N. vitripennis*' venom. This study shows  
38 that successful reproduction of *N. vitripennis* at 15 days was achieved by hyperparasitizing, a  
39 capability that provides a fitness benefit to *N. vitripennis*, as it extends the time window that hosts are  
40 available for parasitization. Choice tests with hosts at different time intervals after *T. zealandicus*  
41 oviposition revealed a partial mismatch in *N. vitripennis* females between competition avoidance and  
42 offspring performance, which may be linked to the limited co-evolutionary time between native and  
43 introduced species. We discuss our results in the context of nutritional ecology and, specifically, the  
44 role of lipids in ecological interactions.

45

## 46 **Introduction**

47 Interspecific interactions in nature often revolve around the acquisition of nutrients, for example  
48 through facilitation or competition among interacting species (Stuart Chapin et al. 2012). Competitive  
49 interactions can occur if multiple organisms compete for access to the same nutrients from the same  
50 source (Gause 1934; Tilman 1982). Depending on the organisms' metabolic requirements, competition  
51 may involve monopolization of different types of nutrients. Well-known examples include strategies  
52 whereby plants compete to obtain nitrogen-containing nutrients in nitrogen-limited environments  
53 (Moreau et al. 2019), and shifts in nutrient limitations among herbivore life-stages affecting foraging  
54 strategies (Richard and de Roos 2018). Competitive pressure depends on the balance between the  
55 availability of nutrients as well as the metabolic requirements of the competing organisms, with the  
56 strongest competitive interaction expected when the nutrients that are competed for are limited but  
57 essential for metabolic functions. Essential nutrients are metabolites that the organisms cannot  
58 synthesize themselves but are required for normal physiological function (Burr et al. 1932; Mazumdar  
59 and Striepen 2007); hence these nutrients have to be taken up from an external source. Species differ  
60 in their exogenous requirement for nutrients such as vitamins, amino acids and lipids, which are  
61 essential for some species but not for others (Mazumdar and Striepen 2007). Competitive interactions  
62 between species for essential nutrients are likely to impose selection on their ability to monopolize,  
63 consume and store these nutrients.

64

65 An increasing number of species has been shown to rely on exogenous lipid acquisition as they lack  
66 the ability to synthesize fatty acids *de novo* or in sufficient quantity (Ellers et al. 2012; Keymer and  
67 Gutjahr 2018). Across several kingdoms of life lipid scavenging or lipid parasitism has evolved, which  
68 involves the transfer of lipids from host in a symbiotic interaction, for instance mycorrhizal fungi  
69 (Luginbuehl et al. 2017; Keymer and Gutjahr 2018), parasitic fungi (Xu et al. 2007), parasitic protists  
70 (Schwelm et al. 2015), apicomplexan parasites (Mazumdar and Striepen 2007), and the bacterium  
71 *Spiroplasma* (Herren et al. 2014) are all known to lack lipogenic abilities. However, the highest  
72 frequency of lipid scavenging is found among parasitic insects: parasitoid wasps, flies and beetles

73 (Giron and Casas 2003; Visser and Ellers 2008; Visser et al. 2010). These parasitoids obtain all  
74 required lipids by feeding on their hosts as larvae, which likely relaxed selection on autotrophic fatty  
75 acid production (Lahti et al. 2009), eventually leading to full dependency on host lipids (Ellers et al.  
76 2012).

77

78 Parasitoids develop in or on a host, killing it in the process (Godfray 1994). The developing parasitoid  
79 larva is thus dependent on the resources available from a single host to successfully complete  
80 development (Vinson and Iwantsch 1980; Sequeira and Mackauer 1992; Harvey 2005). Field studies  
81 have occasionally found up to ten or even more parasitoid species per host species (Price 1972;  
82 Elzinga et al. 2007; Oishi and Sato 2008; Kostenko et al. 2015; Abell et al. 2016; Šigut et al. 2018), so  
83 competition between parasitoid species attacking the same host is expected to be common in nature  
84 (Price 1972; Slansky 1986). Acquisition of sufficient lipid reserves during the larval period is crucial  
85 to parasitoid fitness as most (but not all) parasitoid species lack lipogenic abilities (Visser et al. 2010),  
86 and lipids of freshly emerged adults are necessary for egg maturation and survival (Ellers 1996).  
87 However, whether and how competitive interactions have shaped the lipid acquisition strategy of  
88 parasitoid species is currently unknown.

89

90 Here we study the nutritional ecology of competitive interactions between parasitoid wasps attacking  
91 the same host, focusing on how differences in host utilization strategy between the species affect their  
92 competitive abilities. The jewel wasp *Nasonia vitripennis* is an ectoparasitoid that lays its eggs on  
93 blowfly host pupae in carrion, where it may regularly encounter hosts that have previously been  
94 parasitized by earlier-arriving larval-pupal parasitoid species from the genera *Tachinaephagus*, *Alysia*  
95 and *Aphaereta*, some of which are capable of parasitizing up to 20% of available hosts in open semi-  
96 natural field sites (Voss et al. 2009), whereas up to 48% of hosts can be parasitized in urban biotopes  
97 (Frederickx et al. 2013). *Tachinaephagus zealandicus* (Hymenoptera: Chalcidoidea) is an  
98 endoparasitoid, ovipositing multiple eggs in the larvae of a blowfly host on carrion (Olton and Legner  
99 1974). These parasitoid species nowadays coexist on at least four continents (Carvalho et al. 2004;  
100 Turchetto and Vanin 2004; Voss et al. 2009; Frederickx et al. 2013) It is therefore likely that *N.*  
101 *vitripennis* regularly encounters hosts previously parasitized by *T. zealandicus* and may have evolved  
102 adaptations to dominate in intrinsic competition for host resources (Price 1972) or to avoid  
103 competition altogether by discriminating against parasitized (Cusumano et al. 2016). Consequently,  
104 they are therefore likely to compete for host resources under certain circumstances (van Velzen et al.  
105 2016).

106

107 When encountering a parasitized host pupa, *N. vitripennis* can either multiparasitize the host and  
108 compete with the first parasitoid for nutrients (Harvey et al. 2013), or hyperparasitize the parasitoid

109 larvae already growing in the hosts, thus consuming nutrients that have been metabolized by the first  
110 parasitoid (Sullivan and Völkl 1999; Harvey et al. 2009) or exploit both simultaneously (Harvey et al.  
111 2011). It is known that *N. vitripennis* is able to hyperparasitize larval parasitoids, e.g. this is  
112 occasionally observed for the solitary *Alysia manducator* (Graham-Smith 1919; Altson 1920; Peters  
113 and Abraham 2010). However, whether this species can at least partially hyperparasitize facultatively  
114 on the gregarious *T. zealandicus* is unknown. Hyperparasitism would confer higher fitness if *T.*  
115 *zealandicus* would be capable of fatty acid synthesis or would be more efficient in acquiring lipids  
116 from the host. Lack of lipogenesis has been confirmed in *N. vitripennis* (Rivero and West 2002; Visser  
117 et al. 2012; but see Prager et al. 2019), but it is hitherto unknown whether *T. zealandicus* possesses  
118 any lipogenic capabilities. Furthermore, the duration of the time lag between arrivals of either species  
119 (i.e. the developmental stage of *T. zealandicus*) is likely to have an effect on the reproductive success  
120 and lipid acquisition of *N. vitripennis* (Harvey et al. 2011; Zhu et al. 2016).

121

122 In the present study we investigate (1) whether *T. zealandicus* shows lack of lipogenesis, (2) whether  
123 the developmental stage of *T. zealandicus* has an effect on *N. vitripennis*' offspring emergence success  
124 and fitness, (3) whether *N. vitripennis* is able to hyperparasitize on *T. zealandicus*, (4) whether *N.*  
125 *vitripennis* can detect the presence of *T. zealandicus* larvae inside a potential host, (5) if females prefer  
126 to oviposit on a host that has not been previously parasitized by *T. zealandicus*, and (6) whether there  
127 is a match between offspring lipid acquisition and host preference (Jaenike 1978).

128

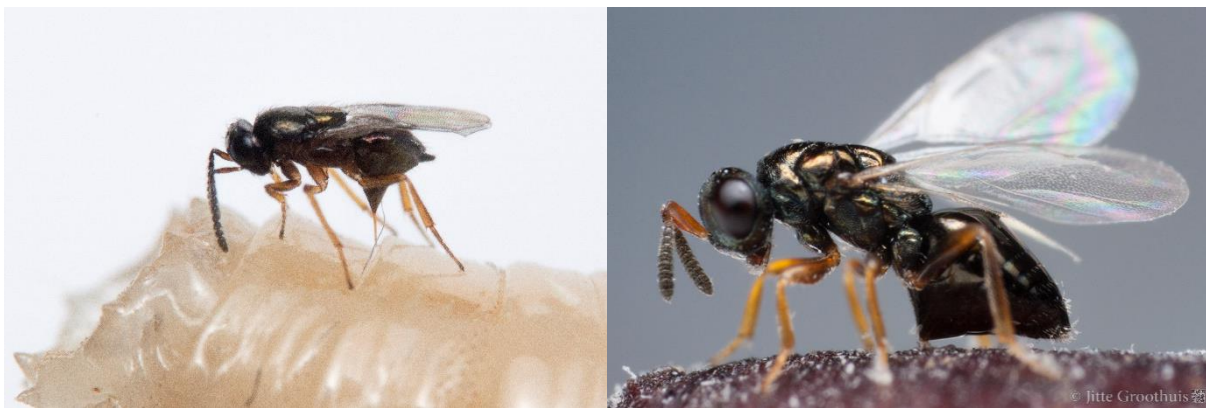

129

130 Figure 1. Images of adult females of the two parasitoid species studied here: *Tachinaephagus*  
131 *zealandicus* ovipositing on a host larva (left) and *Nasonia vitripennis* ovipositing on a host pupa  
132 (right). Pictures by Jitte Groothuis.

133

134

## 135 **Methods**

### 136 Study organisms

137 *Nasonia vitripennis* (Hymenoptera: Chalcidoidea: Pteromalidae) is a cosmopolitan idiobiont  
138 ectoparasitoid (Whiting 1967) and a lipid scavenger (Visser et al. 2012). The females oviposit on fly  
139 puparia, which she finds on carcasses and in birds' nests (Whiting 1967; Peters 2010). After the eggs  
140 hatch, the first instar larvae will move away from the egg shell and begin to feed on the host by  
141 puncturing the host skin with their mandibles. The larvae imbibe the body fluid of the host and will  
142 remain in the same position, unless disturbed, until it is fully grown (Whiting 1967). Development  
143 from egg to adult takes about 22 days at 20°C. In our experiments, we used the isofemale strain  
144 AsymCX, which had been reared on *Calliphora vomitoria* at the Vrije Universiteit Amsterdam for 52  
145 generations prior the experiments.

146 *Tachinaephagus zealandicus* (Hymenoptera: Chalcidoidea: Encyrtidae) is a koinobiont endoparasitoid  
147 with unknown lipogenic abilities, originating from Australasia (Olton and Legner 1974; Subba Rao  
148 1978). It was introduced to some areas as a biological control against carrion flies, spread  
149 independently to other locations, and is now found globally (Olton and Legner 1974; Ables 1977;  
150 Ferreira de Almeida et al. 2002; Geden and Skovgård 2014; Peters 2014). The eggs are oviposited in  
151 the fly larvae, but the parasitoid development only starts after the host has pupated (Olton and Legner  
152 1974). The strain "HHx" of *T. zealandicus* used in this study was reared from *Parasarcophaga*  
153 *caerulescens* larvae, gathered on 30 August 2014 from Oostvoorne, the Netherlands (H. Huijbregts,  
154 pers. comm.). This strain was reared in the lab for 5 generations prior to the experiments. The  
155 development from egg to adult takes about 32 days at 20°C.

156

#### 157 Testing lipogenic abilities of *T. zealandicus*

158 Freshly emerged wasps were randomly allocated to one of two treatments: 'Emergence', in which  
159 wasps were killed by freezing at -20°C on the day of emergence, or 'Fed1wk', which had *ad libitum*  
160 access to a 20% (w/v) sucrose solution for one week. We measured the lipid content of wasps from the  
161 Emergence treatment, and wasps that survived the Fed1wk treatment. We followed a modified  
162 protocol of David et al. (1975; Ellers 1996). Wasps were first individually checked for body integrity  
163 under a microscope (Leica WILD M8). The wasps were each placed in a labelled glass vial (Lenz  
164 Laborglas, Wertheim, Germany), freeze-dried for 2 days and subsequently weighed on a microbalance  
165 (Mettler Toledo UMT2, d=0.1 µg). Next, 4 mL di-ethyl ether was added to each vial in order to  
166 dissolve all lipids from the wasp's body. After 2 days, the wasps were removed from the ether and  
167 dipped in fresh ether to wash off any residue. All wasps were freeze-dried again and weighed on the  
168 same microbalance. The lipid content of each wasp was calculated as the dry weight before ether  
169 extraction minus the dry weight after ether extraction. Afterwards, all wasps were checked for body  
170 integrity. Wasps that missed any body parts were removed from the analysis because this would bias  
171 the calculation of lipid content.



172 Differences in lipid content between treatments were analyzed using ANCOVA with treatment as  
173 independent variable and fat-free dry weight as a measure for body size as covariate. An increase in  
174 lipid content after one week of feeding is evidence for lipogenic abilities, while lack of lipogenesis  
175 would be inferred if the lipid content was highest at emergence.

176

#### 177 Design and timing of the treatments in competition experiments and choice tests

178 Competitive performance of either species was tested in competition experiments and host preference  
179 was assessed with choice tests. To obtain consistently parasitized hosts for each test in sufficient  
180 quantity, we prepared an excess of tubes with one *T. zealandicus* female, one *C. vomitoria* larva and  
181 some saw dust, at 20 °C. At the same time, an equal number of *C. vomitoria* larvae were added to a  
182 glass rearing jar with a layer of sawdust to allow them to pupate; these were the non-parasitized hosts  
183 used as controls in the experiments.

184 *T. zealandicus* parasitized hosts were offered at various stages of development to *N. vitripennis*  
185 females. Host pupae in the ‘Early’ treatment contained egg or first instar larva of *T. zealandicus*, in the  
186 ‘Middle’ treatment they contained second to third instar larva of *T. zealandicus*, and in the ‘Late’  
187 treatment the host was completely consumed by *T. zealandicus* larvae, just before these started to  
188 pupate.

189 To determine the exact timing of Middle and Late treatments after host pupation, we first measured the  
190 time required for *T. zealandicus* to reach the different developmental stages at 20°C. 100 females were  
191 allowed to oviposit individually on single hosts. 25 hosts were dissected every five days after  
192 oviposition and developmental stage of the parasitoids inside was recorded. Based on the resulting  
193 developmental curves (see results), the timing of the Early, Middle and Late treatments were  
194 determined at 3, 9 and 15 days after *T. zealandicus* parasitized the host, respectively. These treatment  
195 timings were implemented in both the competition experiments and the choice tests.

196 *N. vitripennis* females that are inexperienced in laying eggs will take a longer time to find and  
197 parasitize a host than experienced females (Rivers and Denlinger 1994). Therefore, females were  
198 ‘trained’ prior to the experiments following standard protocols by giving them an oviposition  
199 experience. Briefly, fresh females were placed in a plastic tube with 20-25 fly pupae with demi water  
200 and honey offered on the plug, and left at 20°C for one day. At least three hours prior to the start of the  
201 experiment, the hosts were removed from the tube to give the females time to recuperate before the  
202 start of the experiment, as *N. vitripennis* females need 1-4 hours after oviposition to recover, before  
203 doing so again (Edwards 1954; King and Rafai 1970). This experience was given to all *N. vitripennis*  
204 females prior to both the competition experiments and choice tests.

205 All competition experiments and behavioral observations were verified by dissections of parasitized  
206 hosts. All experiments were performed at 20°C, 75% relative humidity and a 16:8 L:D light regime.

207

208 Competition experiments

209 To determine the competitive strength of each species at each time point, 120 pupated hosts (in two  
210 blocks of 60, separated by one day) parasitized by *T. zealandicus* were divided over the three  
211 competition treatments described above and put separately in a 75x23.5mm plastic tube with a  
212 styrofoam plug. At the appropriate timing for the treatment a fed and experienced *N. vitripennis*  
213 female of 3 to 4 days old was added. The females were allowed to oviposit for 24 hours at 20°C, after  
214 which the parasitized hosts were kept at 20°C. Four control treatments were performed in parallel in  
215 order to disentangle the effects of host age and multiparasitism on the performance of *N. vitripennis*  
216 and *T. zealandicus*, each with the same replication as in the competition treatments. Three control  
217 treatments (Control<sub>Early</sub>, Control<sub>Middle</sub> and Control<sub>Late</sub>) had non-parasitized hosts of ages matched to the  
218 respective competition treatments. To each host a single *N. vitripennis* female was added which was  
219 allowed to parasitize for 24 hours. Control<sub>Late</sub> was found to give an unexpected, but trivial, zero-fitness  
220 result for *N. vitripennis*, as the host flies already emerged from the pupae two days before the wasp  
221 was supposed to oviposit. To test the performance of *T. zealandicus* when parasitizing alone, a control  
222 treatment (Control<sub>Tz</sub>) was performed in which each host was parasitized by one *T. zealandicus* female  
223 as above, but without later addition of *N. vitripennis*.

224 We measured several fitness components of emerging offspring: emergence success, brood size,  
225 development time, and offspring lipid content. The number of successfully emerging wasps of either  
226 species was scored for each host in all treatments. Development time was measured in days between  
227 oviposition and emergence of the first individual of each species. The lipid content of one random  
228 female per emerging brood of *N. vitripennis* was measured using the methods described above. The  
229 total brood mass of *T. zealandicus* was measured because the brood size varied notably: brood sizes  
230 ranging from 2 to 102 offspring were found. Total brood mass was measured by freeze-drying the  
231 broods in Eppendorf tubes for 48 hours, and their dry weight was measured including the tubes. After  
232 the initial weighing, the wasps were removed from the tubes, which were then cleaned with a soft  
233 brush and weighed again. The dry weight of the brood was obtained by subtracting this latter weight  
234 from the initial measurement.

235 No *N. vitripennis* offspring emerged in the Middle treatment. In order to confirm that *N. vitripennis*  
236 actually oviposited on the hosts offered in the competition experiments of this treatment, an extra  
237 experiment was performed similar to the Middle treatment. The host was made only partially available  
238 to the ovipositing female by putting the *T. zealandicus*-parasitized host in a foam plug with a pupa-  
239 sized hole in it, so that only the posterior end of the pupa was exposed. This made it easier to locate *N.*  
240 *vitripennis* eggs when opening the cocoon on the posterior end.

241 In a separate experiment we compared the effects of *N. vitripennis* venom injection against mechanical  
242 damage alone, on survival of *T. zealandicus* larvae. 40 hosts parasitized by *T. zealandicus* in the Late  
243 developmental stage were split over two treatments: either they were offered individually to a *N.*

244 *vitripennis* female as above in a plug with a pupa-sized hole in it for a period of 24 hours, after which  
245 the female was removed; or we applied a control treatment where we inflicted only mechanical  
246 damage by puncturing the host between the second and third segment from the posterior end with a  
247 sterilized microneedle with diameter 32 - 126  $\mu\text{m}$  (measured from tip to thickest point), slightly bigger  
248 than *N. vitripennis*' ovipositor which is approximately 24  $\mu\text{m}$  thick. 48 hours after the start of the  
249 experiment all cocoons were carefully opened at the exposed area. Any *N. vitripennis* eggs were  
250 removed from the sting site to exclude effects induced by the developing *N. vitripennis* offspring. The  
251 hosts with *T. zealandicus* larvae were placed gently inside a transparent gelatin capsule (size 1, SVM  
252 Grondstoffen, De Meern, the Netherlands), to protect them from injury and desiccation. They were  
253 allowed to develop to adulthood, after which all *T. zealandicus* were killed by freezing. Not all wasps  
254 complete development and emerge successfully. The host carcasses were dissected and the numbers of  
255 developed and undeveloped *T. zealandicus* were counted.

256

### 257 Choice tests

258 We performed a series of choice test to determine whether *N. vitripennis* females discriminate between  
259 *T. zealandicus* parasitized hosts and non-parasitized hosts at each of the three treatment time points.  
260 These choice tests were conducted by placing an experienced *N. vitripennis* female and two fly pupae  
261 in a 55mm Petri dish without vents. The pupae were placed 2 cm apart and at equidistance from the  
262 center of the dish in a tiny drop of water to prevent them from rolling around. In the Early (n=60),  
263 Middle (n=60), and Late (n=30) treatments, one of the hosts was parasitized by *T. zealandicus*, and the  
264 other was not parasitized. The non-parasitized hosts for the Late treatment were 11 days old instead of  
265 15 days, because *C. vomitoria* emerge from the pupae after 13 days. The parasitized host was placed to  
266 the left or to the right of the center of the Petri dish at random for each separate trial. As a control  
267 treatment, females were given access to two non-parasitized hosts (n=40).

268 We scored for each trial 1) whether the wasp landed on any host; 2) on which host the wasp landed  
269 first; 3) what behaviors the wasp performed on that first host (Edwards 1954); 4) whether the wasp  
270 chose to oviposit on any host; and 5) which host was finally chosen for oviposition. Once a female had  
271 completed the full behavioral sequence, it was considered to have made a choice and then she was  
272 removed from the Petri dish. Wasps that had not performed this full behavioral sequence after 1.5  
273 hours were considered not to have made a choice. Afterwards all hosts were stored individually in  
274 labelled Eppendorf tubes and stoppered with a foam plug.

275 To confirm that the hosts that should have been parasitized by *T. zealandicus* indeed contained  
276 parasitoid larvae, the hosts were dissected and investigated under a microscope (Leica WILD M8). If  
277 larvae were visible inside the host, or if the host was disintegrated (the effect of *T. zealandicus* venom)  
278 it was marked as parasitized. If the host was not parasitized by *T. zealandicus*, the choice the  
279 individual had made was invalid and the data from this trial excluded from the analysis. In addition,



280 this dissection served to verify oviposition by *N. vitripennis* on the host. All other hosts were kept in a  
281 climate chamber at 25°C and checked for emergence of *N. vitripennis*, as emerging offspring are direct  
282 evidence of successful oviposition. If no wasps had emerged from the pupa after the expected time for  
283 emergence of *N. vitripennis*, the pupa was dissected. In all these cases the host was dead and dried out.  
284 As there was no way to tell if the host had been alive at the time of the experiment, the data observed  
285 from these replicates were removed from the analysis. Based on these criteria we removed the data  
286 from 11, 9 and 1 choice trials from the treatments Early, Middle and Late, respectively.

287

### 288 Data analyses and statistics

289 All analyses were performed in R version 3.2.1 (R Development Core Team 2015).

290 In the competition experiments, emergence of any number of individuals of a species was scored as a  
291 success for that species, i.e. both species can be successful on the same host (host-sharing). Emergence  
292 success of *N. vitripennis* and *T. zealandicus* was tested for significant differences using an  
293 overdispersion-corrected binomial Generalized Linear Model with treatment as independent variable  
294 for both species separately.

295 To determine the effects of competition on the fitness of the emerged offspring of *N. vitripennis* and *T.*  
296 *zealandicus*, we tested for differences in their fitness components. For *N. vitripennis* we tested for  
297 significant differences in the fitness components brood size, development time and lipid content.  
298 Differences in developmental time were tested using a Kaplan-Meier survival analysis with a Log-rank  
299 test to test for differences between the fitted curves. Differences in brood sizes were compared using a  
300 non-parametric Kruskal-Wallis test due to the non-normality of the data. As a posthoc test we  
301 compared each of the treatments pairwise with a Wilcoxon rank sum test with Holm-Bonferroni p-  
302 value adjustment (R Development Core Team 2015). The lipid content of wasps were compared using  
303 a Generalized Linear Mixed Model (GLMM, nlme package) with lipid content as dependent variable  
304 and fat-free body weight as co-variable, treatment as independent variable, and block as random  
305 variable. A post-hoc Tukey-test was done to compare the differences between each of the treatments  
306 when the GLMM showed a significant result.

307 As a final analysis of the costs and benefits of competition we calculated the estimated fitness for each  
308 competition treatment expressed as the average amount of lipids acquired per brood in that treatment.  
309 Lipid acquisition was calculated by multiplying mean brood size with mean per capita lipid content.  
310 Variances were summed accordingly. Wasps have optimal fitness on recently-pupated hosts without  
311 competitor (Whiting 1967), i.e. the Control<sub>Early</sub> treatment is expected to provide the highest lipid  
312 content. 95% confidence intervals of the amount of lipid acquired were calculated for each treatment.  
313 Estimates of lipids acquired with non-overlapping confidence intervals were considered to be  
314 significantly different.

315

316 For *T. zealandicus* we compared the total dry weight of the brood as a measure of fitness. Differences  
317 in the total dry weight of the successfully emerged offspring were tested using a GLMM with log-  
318 transformed weights (to meet assumptions of normality) as dependent variable, treatment as  
319 independent variable, and block as random variable. A posthoc Tukey-test was performed to compare  
320 the differences between each of the treatments when the GLMM showed a significant result.  
321 Furthermore, we compared the numbers of undeveloped larvae from the separate experiment where  
322 broods were attacked by *N. vitripennis* or mock-injected with a microneedle using a one-way  
323 ANOVA.

324

325 The choice tests were analysed in four subsequent steps. (1) The number of trials where a wasp did not  
326 land on any host were tested for significant differences between treatments using an overdispersion-  
327 corrected binomial Generalized Linear Model with treatment as independent variable. These trials  
328 were excluded from subsequent data analyses. The same statistical test was applied for the number of  
329 trials where a wasp did not make a choice for any host, i.e. the wasp landed on at least one host, but  
330 did not oviposit. If the GLM was found to give significant results, a posthoc test using Dunnett  
331 contrasts was applied. (2) The number of trials where wasps chose to land on the parasitized host was  
332 tested for each treatment separately with a Binomial test against a null expectation of random choice,  
333 i.e. the probability of choosing the parasitized host was set at 0.5. (3) For each of the behaviors we  
334 tested whether the odds ratio of performing the next behavior was less than one using Fisher's Exact  
335 Test separately for each combination of treatment and host first landed on. If the odds ratio to proceed  
336 with the next behavior is significantly less than one, this is indicative of rejection of the host after  
337 performing a certain behavior. (4) The number of trials where wasps chose to oviposit on the non-  
338 parasitized host was tested for each treatment separately with a Binomial test against a null expectation  
339 of random choice, i.e. the probability of choosing the parasitized host was set at 0.5.

340

341

## 342 **Results**

### 343 No increase in *Tachinaephagus zealandicus* lipid content after one week of feeding

344 The lipid content of *T. zealandicus* females (Figure 2) that fed *ad libitum* on a sucrose solution for one  
345 week was significantly lower than in freshly emerged wasps (ANCOVA,  $F_{1,20}=31.12$ ,  $p<0.001$ ) and  
346 increased with body size ( $p<0.001$ ).

347

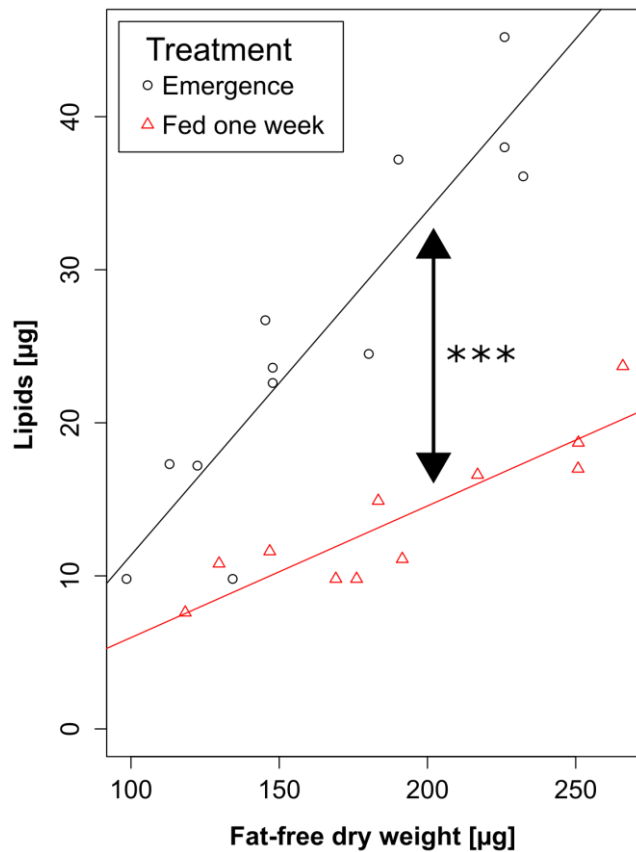

348

349 Figure 2. *T. zealandicus* is a lipid scavenger: Lipid content of *T. zealandicus* was highest at emergence  
350 and had significantly lower after one week of feeding on a sucrose solution.

351

352 *Tachinaephagus zealandicus* development and timing of treatments

353 All hosts pupated within 3 days after oviposition by *T. zealandicus* on the host larvae. The wasp's  
354 developmental curves from egg, through the larval instars and pupal stage, to adult are plotted in  
355 figure 3A. Figure 3B shows the derived timing of the treatments for the competition experiments and  
356 choice tests.

357

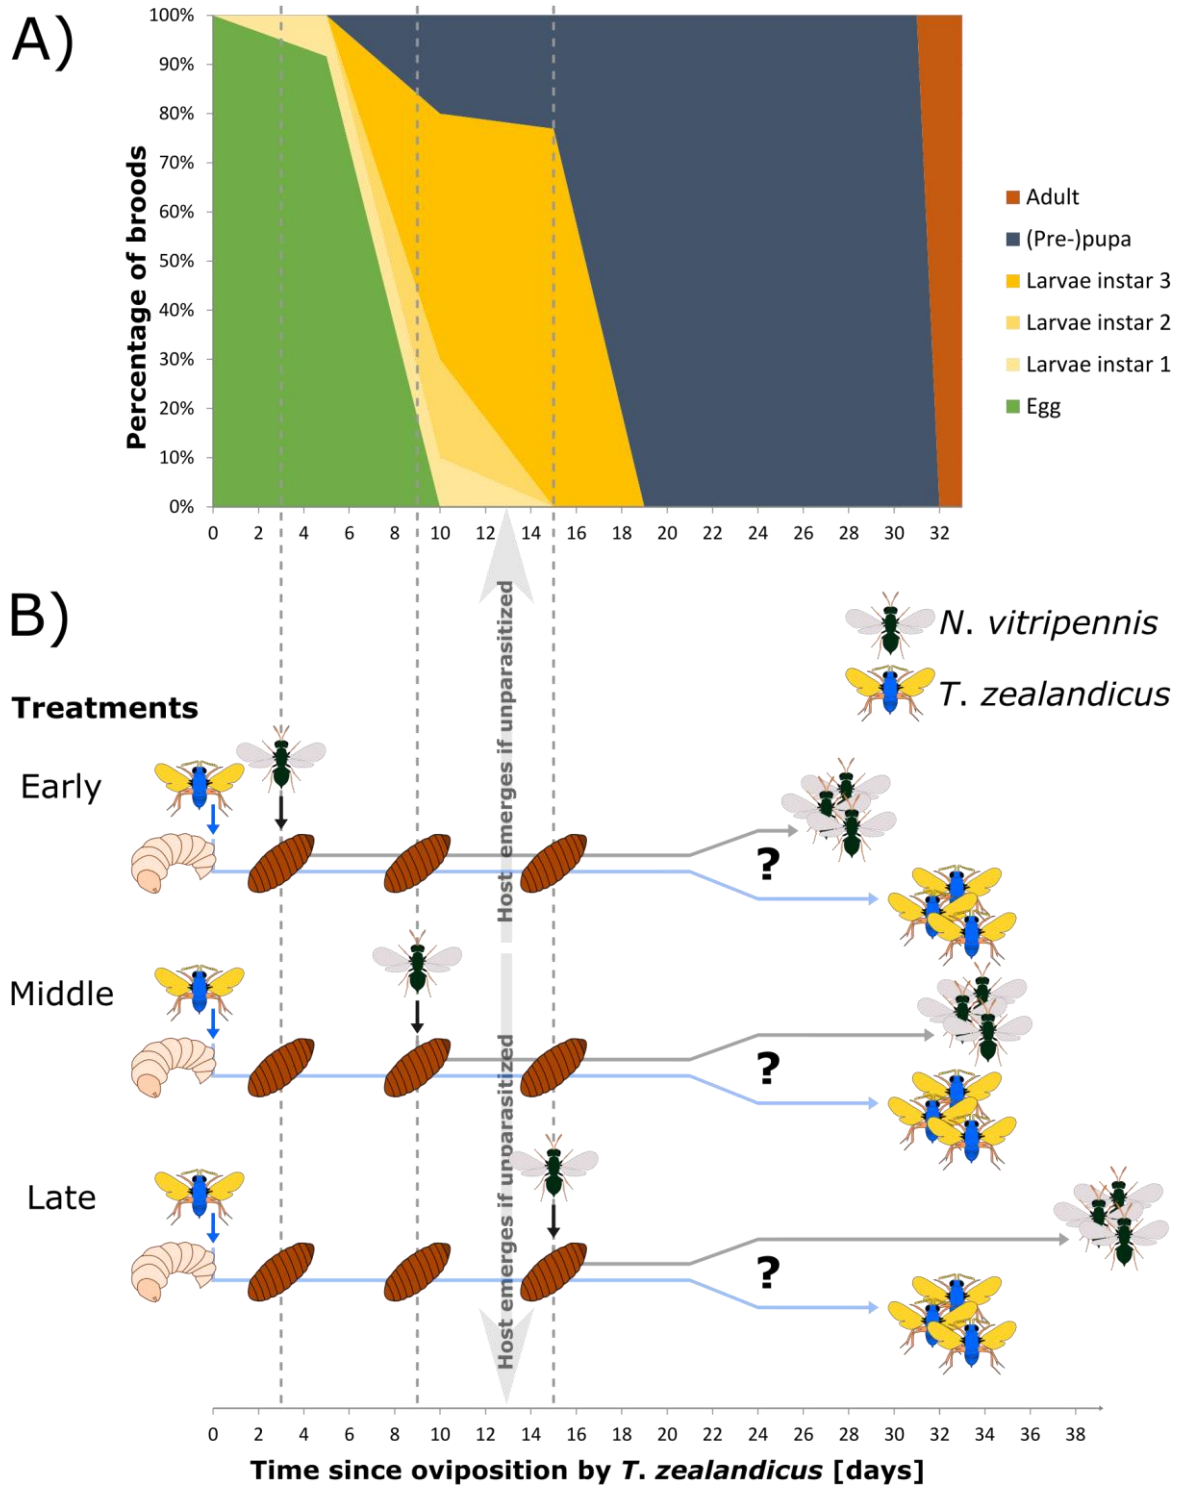

358

359 Figure 3. Development of *T. zealandicus* at 20°C through all life stages, and the timing of treatments  
 360 for competition and choice tests. A) The development of *T. zealandicus* from oviposition to adult  
 361 emergence. 25 parasitized hosts were dissected on day 5, 10, 15 and 19 to determine the percentage of  
 362 broods per developmental stage. Vertical dotted lines at 3, 9 and 15 days represent the timing of the  
 363 Early, Middle and Late treatment, respectively. B) The experimental setup where *N. vitripennis* is

364 introduced to host parasitized by *T. zealandicus* during three different developmental stages of *T.*  
365 *zealandicus* inside the host. The Early treatment shows *N. vitripennis* introduced just after the  
366 parasitized host has pupated, the Middle treatment shows the introduction of *N. vitripennis* during a  
367 later larval instar phase of *T. zealandicus*, and finally, the Late treatment shows *N. vitripennis*  
368 introduction after the host has been fully consumed by *T. zealandicus*. The approximate moment  
369 where unparasitized hosts emerged is indicated. Control treatments (i.e. either species' success without  
370 competition) are not depicted.

371

### 372 Emergence success of both species

373 The emergence success of both species in the different treatments indicates which of the two species is  
374 dominant in a specific treatment (Figure 4). *N. vitripennis* emerged from 65% of hosts in the  
375 Control<sub>Early</sub> to 70% of hosts in the Control<sub>Middle</sub>. The presence of *T. zealandicus* in the Early treatment  
376 had no effect on the emergence success of *N. vitripennis* compared to the success in Control<sub>Early</sub>  
377 (Binomial test, df=39, p=0.869, 95% confidence interval for the probability of success = [0.509,  
378 0.814]). Not a single *N. vitripennis* emerged in the Middle treatment, in sharp contrast to the  
379 Control<sub>Middle</sub> (Binomial test, df=39, p<0.0001, 95% confidence interval for the probability of success =  
380 [0.000, 0.088]). In the Late treatment, *N. vitripennis* emerged from 10% of the hosts, significantly  
381 more than in the controls (see methods; Binomial test, df=39, p<0.0001, 95% confidence interval for  
382 the probability of success = [0.028, 0.236]).

383 *T. zealandicus* emerges from 90% of hosts in Control<sub>Tz</sub>. Multiparasitism by *N. vitripennis* significantly  
384 reduced its success to 35% in the Early treatment (Binomial test, df=39, p<0.0001, 95% confidence  
385 interval for the probability of success = [0.206, 0.517]). However, emergence success of *T.*  
386 *zealandicus* was similar to Control<sub>Tz</sub> in the Middle (Binomial test, df=39, p=0.180, 95% confidence  
387 interval for the probability of success = [0.868, 0.999]) and Late treatments (Binomial test, df=39,  
388 p=0.287, 95% confidence interval for the probability of success = [0.702, 0.943]).

389 Of the 57 hosts from which *N. vitripennis* successfully emerged, 7 also produced *T. zealandicus*. Four  
390 of these were in the Late treatment, i.e. they produced both parasitoid species, while none produced *N.*  
391 *vitripennis* only. No host resources are available anymore in the Late treatment, hence in these cases  
392 *N. vitripennis* can only have hyperparasitized on *T. zealandicus*

393 Note that the proportion of hosts where nothing emerged were all similar to the *Tachinaephagus*-  
394 parasitized control after correcting for multiple comparisons (Binomial tests, df=39, p> $\alpha/6$ ). See figure  
395 4 for an overview of the emergence success of both parasitoid species.

396

397



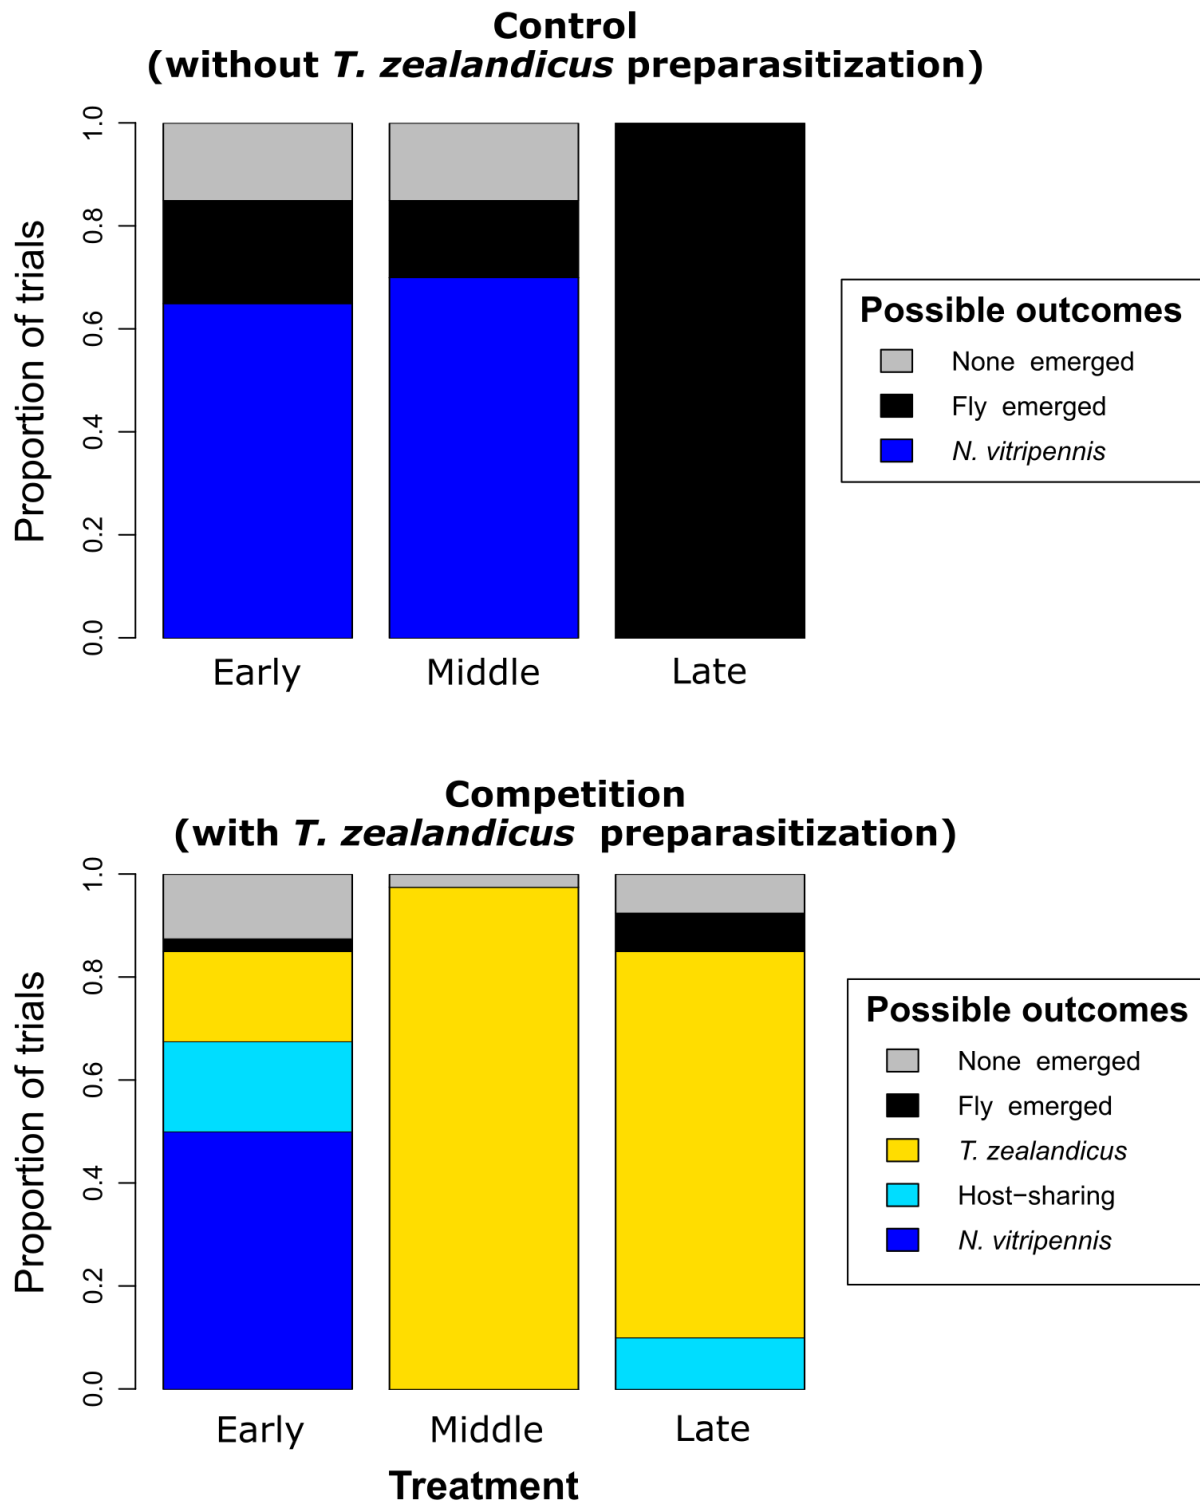

398

399 Figure 4: Emergence success of both species of parasitoids per treatment. The proportion of trials  
400 where either of the two parasitoid wasp species successfully emerged from the different competition  
401 treatments and controls is shown on the y-axis (n=40). Possible outcomes of the trials are: only *N.*  
402 *vitripennis* emerged (dark blue), only *T. zealandicus* emerged (yellow), both parasitoid species  
403 emerged (light blue), the host fly emerged (black) or none emerged (grey) from the host pupae. See the  
404 main text for a description of significant differences.

405

406 Effects of competition on fitness components of *N. vitripennis*

407 Since no offspring of *N. vitripennis* emerged in the Middle treatment, and that wasps did not get an  
408 oviposition opportunity in the Control<sub>Late</sub>, there is no quantitative comparison possible for the fitness  
409 components in these two treatments. Eggs were found on 15 out of 24 *T. zealandicus*-parasitized hosts  
410 in a separate experiment, hence oviposition by *N. vitripennis* on parasitized hosts was confirmed for  
411 the Middle treatment.

412 The egg-to-adult development time of *N. vitripennis* (Figure 5A) differed between treatments  
413 (ANOVA,  $F_{3, 81}=10.108$ ,  $p<0.0001$ ). Development was significantly longer in the Control<sub>Middle</sub> than in  
414 Control<sub>Early</sub> (Tukey contrasts,  $p=0.002$ ), and even longer development in the Late treatment than in the  
415 other treatments (Tukey contrasts,  $p=0.018$ ).

416 Brood size of *N. vitripennis* (Figure 5B) was significantly different between the treatments (Kruskal-  
417 Wallis test,  $\chi^2=11.81$ ,  $df=3$ ,  $p=0.008$ ). Post-hoc tests revealed a significantly larger brood size in  
418 Control<sub>Early</sub> than in Control<sub>Middle</sub> (Pairwise Wilcoxon rank sum test,  $p=0.042$ ), suggesting that recently  
419 pupated hosts are potentially the best stadium for *N. vitripennis* brood size. The lowest brood size (1-6  
420 offspring per host) is found in the Late treatment, a difference which is approaching significance when  
421 compared to the Control<sub>Early</sub> treatment (Pairwise Wilcoxon rank sum test,  $p=0.061$ ). There was no  
422 significant difference between the brood sizes of the Early treatment relative to all other treatments.

423 The lipid content of *N. vitripennis* females (Figure 5C) differed significantly between treatments  
424 (GLMM,  $\chi^2=24.796$ ,  $df=3$ ,  $p<0.0001$ ), with wasps in the Late treatment having significantly lower  
425 lipid content than in the other treatments (Tukey contrasts, all  $p<0.05$ ). The lipid content in  
426 Control<sub>Middle</sub> was significantly higher compared to the lipid content in the Early treatment (Tukey  
427 contrast,  $z=-2.944$ ,  $p=0.017$ ). There was no significant difference between the two control treatments  
428 (Tukey contrasts, all  $p>0.05$ ).

429 *N. vitripennis* was not affected by competition when arriving 3 days after oviposition by *T.*  
430 *zealandicus*, as there was no significant difference between the Early treatment and Control<sub>Early</sub> for any  
431 of the fitness components (development time, brood size, lipid content; respective Tukey contrasts, all  
432  $p>0.05$ ).

433 Only in the Early treatment did we observe hosts from which *N. vitripennis* as well as *T. zealandicus*  
434 emerged (i.e. host-sharing) and hosts from which either species emerged alone. Hence, we can  
435 compare the fitness of *N. vitripennis* between shared hosts and non-shared hosts for the Early  
436 treatment. All fitness components were lower in wasps from shared hosts than in wasps from non-  
437 shared hosts: development time was longer (GLMM,  $\chi^2=6.991$ ,  $df=1$ ,  $p=0.008$ ), brood size was  
438 smaller (GLMM,  $\chi^2=11.690$ ,  $df=1$ ,  $p<0.001$ ), and their lipid content was lower (GLMM,  $\chi^2=4.99$ ,  
439  $df=1$ ,  $p=0.025$ ).

440 We estimated the total lipids (in  $\mu\text{g}$ ) acquired per treatment from a given host for *N. vitripennis*  
441 (Figure 6A). The 95% confidence intervals for lipid acquisition in Control<sub>Early</sub>, Control<sub>Middle</sub> and the  
442 Early treatment were mostly overlapping: [717.9, 1441.4], [511.0, 1114.4], and [553.6, 1359.5],  
443 respectively. In the Late treatment the 95% confidence interval for lipid acquisition was significantly  
444 lower at [33.8, 204.5]. In this treatment it is 15 days after *T. zealandicus* oviposited, when the host is  
445 completely consumed and compartmentalized (see figure 6B).  
446

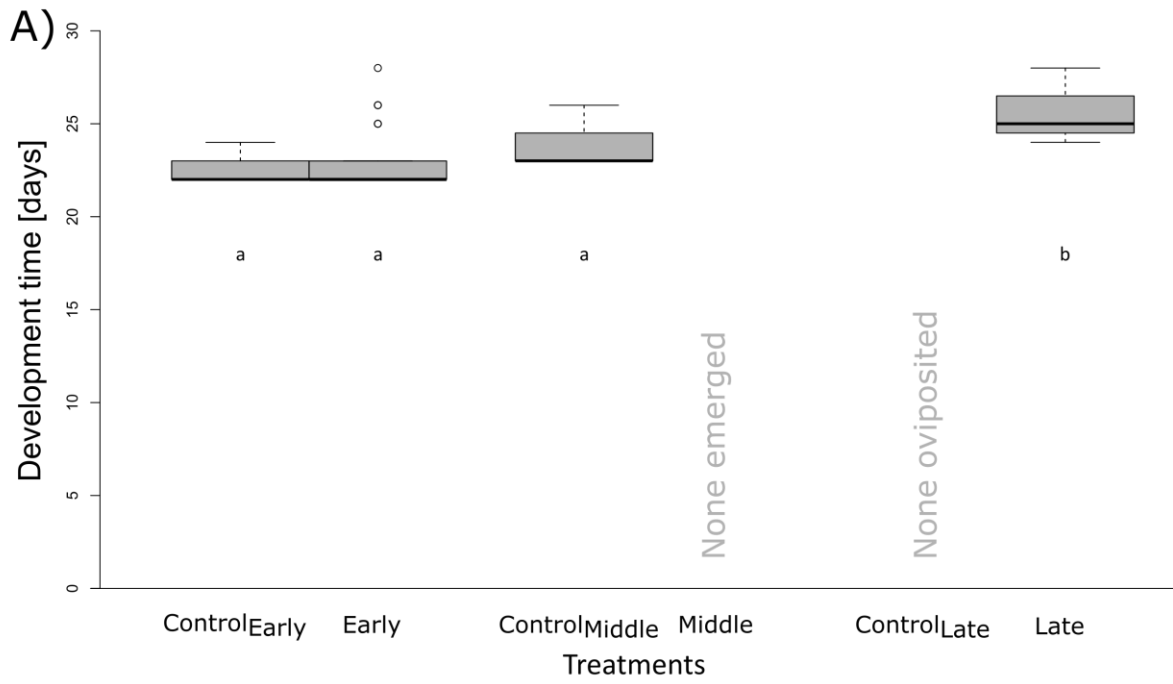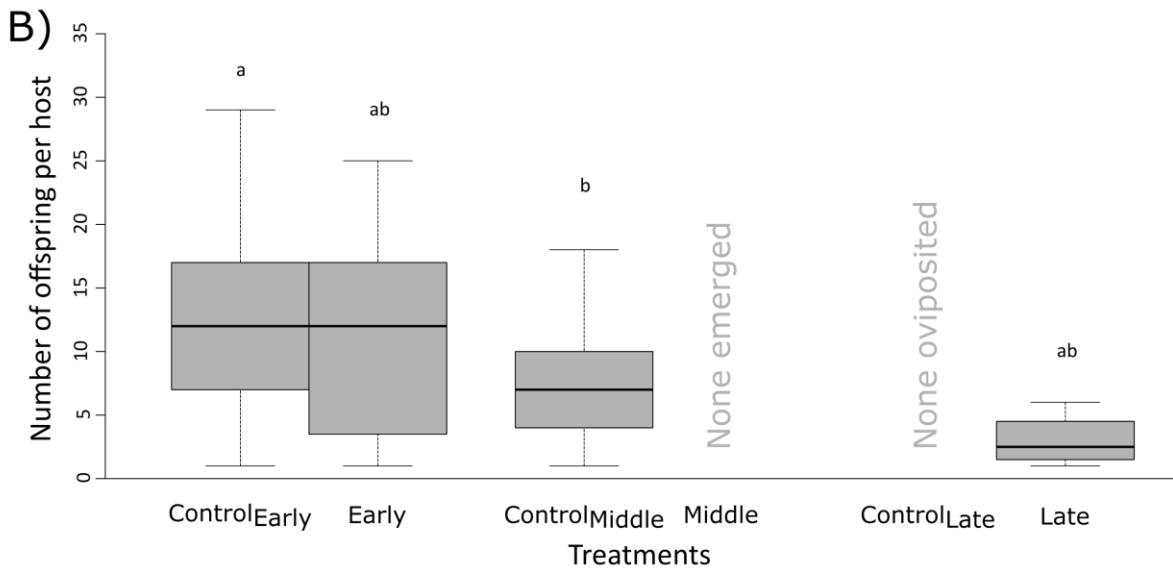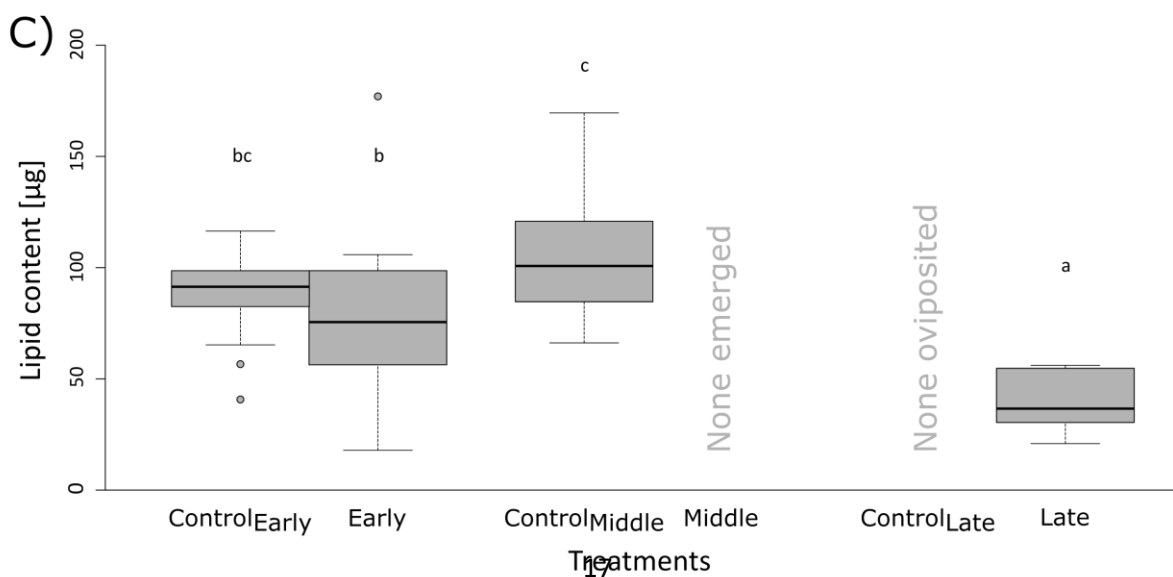

448 Figure 5: Fitness effects of competition on fitness components of *N. vitripennis*. A) Egg-to-adult  
449 development time of *N. vitripennis* per treatment. B) Brood size of *N. vitripennis* brood sizes per  
450 treatment. C) Lipid content of individual *N. vitripennis* offspring per treatment. In all plots, lower case  
451 letters denote significant differences.  
452

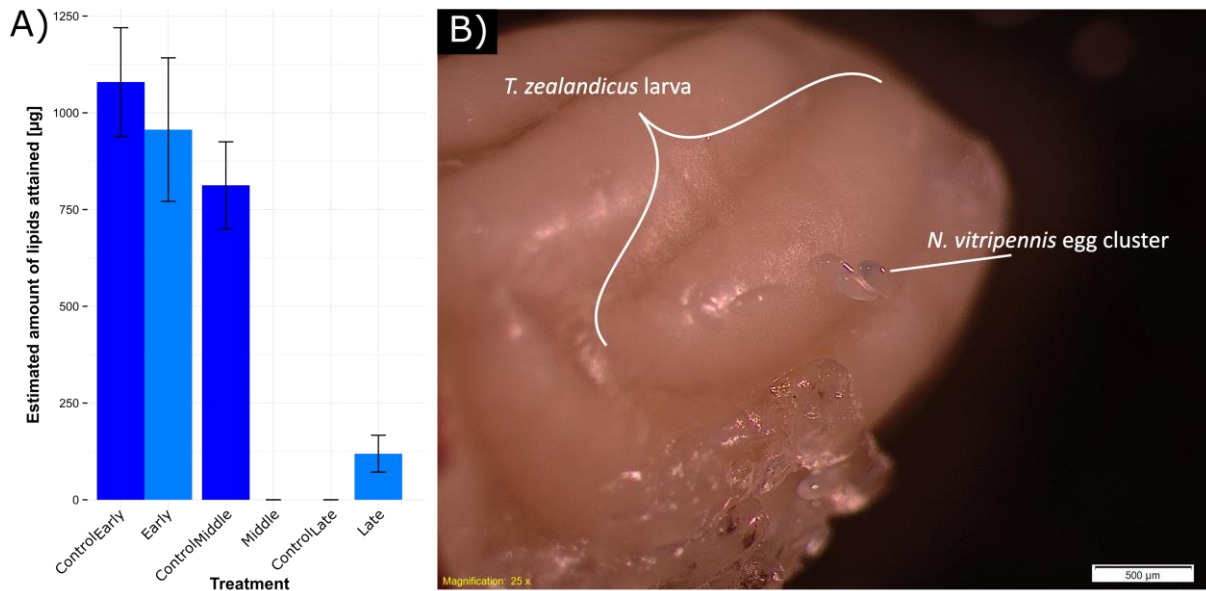

453  
454 Figure 6. A) Estimated total amount of lipids acquired (mean±SE) per brood of *N. vitripennis* per  
455 treatment, calculated from results presented in figure 5. B) Eggs of *N. vitripennis* on fully-grown *T.*  
456 *zealandicus* larvae can only succeed by hyperparasitizing. Here the host cocoon is removed and 15 day  
457 old *T. zealandicus* larvae inside the host's skin are visible (i.e. the Late treatment time point). A cluster  
458 of *N. vitripennis* eggs was found to be oviposited onto them. The host is already fully consumed by the  
459 *T. zealandicus* larvae, effectively compartmentalizing the host's available resources.

460

#### 461 Effect of multiparasitism by *N. vitripennis* on *T. zealandicus*

462 Figure 7A shows the dry weight of *T. zealandicus* broods in each of the treatments. There was a  
463 difference among the treatments (GLMM,  $X^2=39.384$ ,  $df=3$ ,  $p<0.001$ ), with the total brood mass in the  
464 Early treatment being lower than the other treatments (Tukey contrasts, all  $p<0.001$ ). There was no  
465 significant difference between any of the other treatments (all  $p>0.05$ ).

466 The effect of *N. vitripennis* venom on the larvae of *T. zealandicus* caused a significantly higher  
467 number of undeveloped (dead) larvae in the envenomed treatment compared to the microneedle-  
468 injected control treatment (Figure 7B, ANOVA,  $F_{1, 36}=7.855$ ,  $p=0.008$ ). However, many larvae  
469 survived the *N. vitripennis* venom injection and could continue their development. Figure 7C shows a  
470 photograph of typical effects of envenomation by *N. vitripennis* on *T. zealandicus* larvae.

471

472



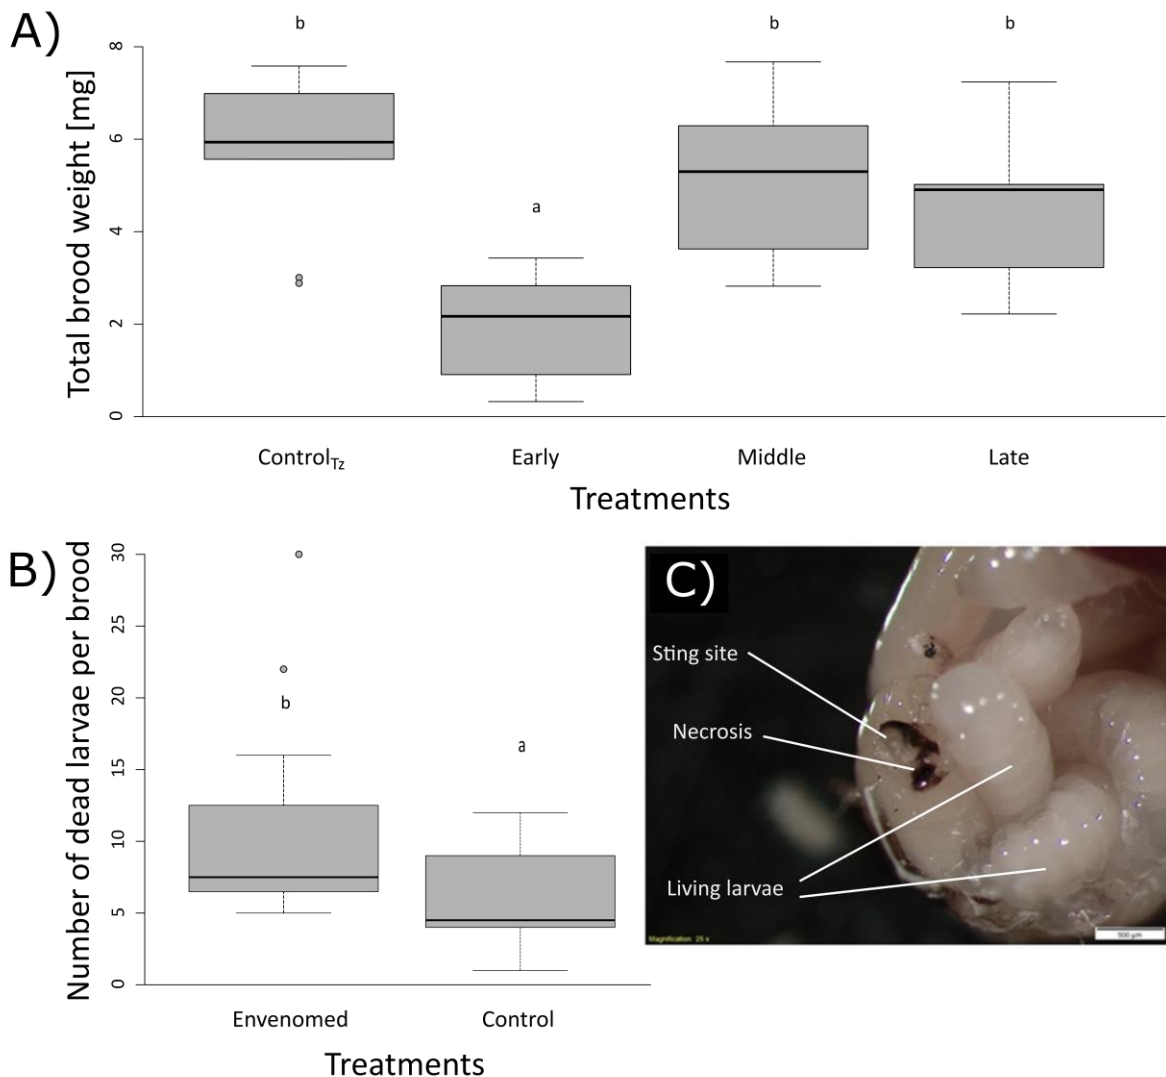

473

474 Figure 7. *T. zealandicus* is negatively affected by competition with *N. vitripennis*. A) Boxplot showing  
475 the differences in total brood dry mass for *T. zealandicus* between the treatments. Lower case letters  
476 denote significant differences. B) Boxplot showing the number of development-arrested *T.*  
477 *zealandicus* larvae that were found in hosts evenomed by *N. vitripennis* and mock-stung hosts. Lower  
478 case letters denote significant differences. C) Picture of the *N. vitripennis* sting site on *T. zealandicus*  
479 larvae. Effect of the venom is visible as necrosis (black tissue) on one of the larvae. Note the lack of  
480 effect on other larvae in the brood.

481

#### 482 Host preference

483 The number of trials in the treatments and control where *N. vitripennis* females did not land on either  
484 host ranged from 5.0 to 14.3%, which was not significantly different among treatments (GLM,  
485  $X^2=3.030$ ,  $df=3$ ,  $p=0.387$ ). While wasps showed no preference for either host to land on first in the  
486 Middle or Late treatments (Binomial tests,  $p=0.442$  and  $p=0.666$ , respectively), 66.7% of wasps in the

487 Early treatment preferred to land first on a host previously parasitized by *T. zealandicus* (Binomial  
488 test,  $p=0.044$ ).

489 After this first landing, wasps can proceed with drumming, drilling and finally oviposition. We tested  
490 for each treatment if this behavioral sequence was broken off and at which behavioral step (Fig 8). The  
491 odds ratio to proceed with the next behavior was significantly less than unity in the Early treatment, as  
492 both on the *T. zealandicus*-parasitized host and on the non-parasitized host fewer wasps oviposited on  
493 the host after performing the drumming behavior (Fisher's Exact tests,  $p=0.020$  and  $p=0.002$ ,  
494 respectively). In the Middle treatment, fewer wasps proceeded with drilling after drumming on the  
495 parasitized host (Fisher's Exact test,  $p=0.025$ ), and in the Late treatment, fewer wasps oviposited  
496 subsequent to drilling into the parasitized host (Fisher's Exact test,  $p<0.0001$ ).

497 After landing on at least one host, there were significant differences between treatments in the number  
498 of wasps that did not oviposit at all (GLM,  $X^2=12.453$ ,  $df=3$ ,  $p=0.006$ ). In the Early treatment, a  
499 significantly higher percentage of wasps did not oviposit (42.9%) compared to the control (7.9%)  
500 (Dunnett's contrasts,  $p=0.029$ ). The final choice of host for oviposition (see figure 9) did not differ  
501 from random choice in the Early or Middle treatments (Binomial tests,  $p=0.185$  and  $p=0.880$ ,  
502 respectively), while in the Late treatment there was a significant preference to oviposit on non-  
503 parasitized hosts (Binomial test,  $p=0.002$ , 95% confidence interval=[0.626, 0.953]).

504

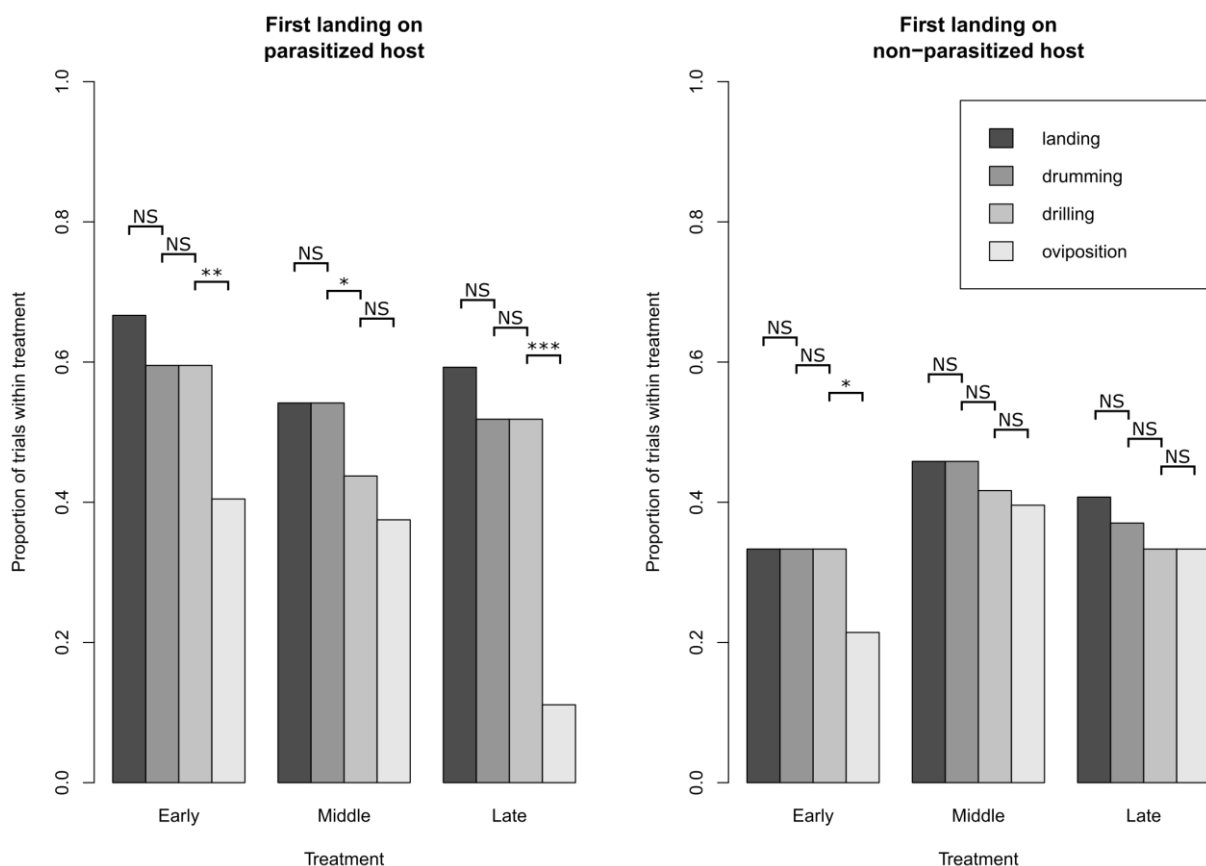

506 Figure 8. Proportions of female *N. vitripennis* that performed behaviors on the first host they landed  
507 on, split into landing first on the parasitized (left panel) versus the non-parasitized host (right panel),  
508 for each of the treatments.

509

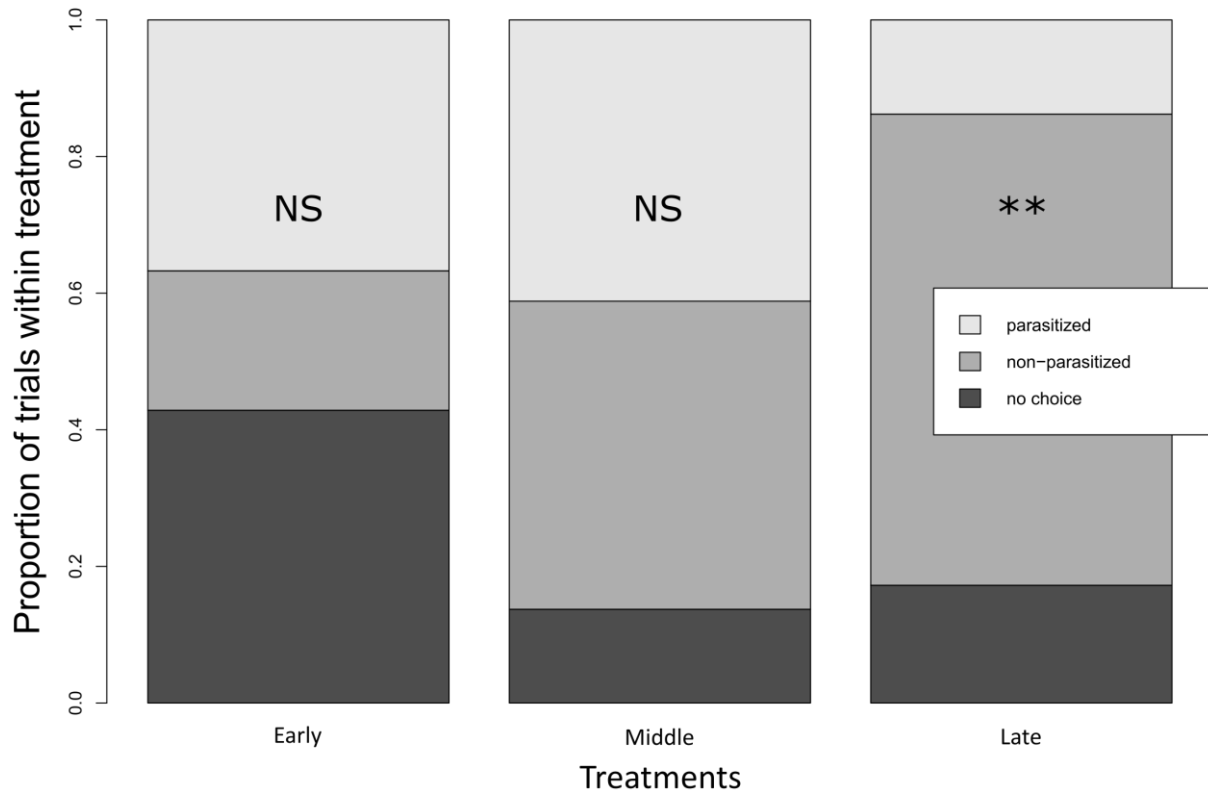

510

511 Figure 9. Final choice of female *N. vitripennis* after examining at least one host in each of the  
512 treatments.

513

#### 514 Discussion

515 In the present study we investigated competitive interactions for host resources between immature  
516 stages of two parasitoid wasp species. Since both species are unable to build lipid reserves from *de*  
517 *novo* synthesis, we expected competition over the available resources to be most intense for host  
518 lipids. As predicted, the amount of lipids acquired by the offspring of pupal parasitoid *N. vitripennis*  
519 was substantially reduced when the earlier-arriving parasitoid *T. zealandicus* had been present in the  
520 host longer. At the stage when *T. zealandicus* has fully consumed the hosts (the Late treatment), *N.*  
521 *vitripennis* oviposited more often in non-parasitized hosts, but at the other stages no preference  
522 was observed. Coevolution between the two species would be expected to match maternal host preference  
523 to offspring performance (Jaenike 1978). This was found in the Early treatment, where there was no  
524 preference and lipid acquisition was equal to controls. However, a match between preference and  
525 performance was not found in the Middle treatment, where wasps obtained no lipids from previously  
526 parasitized hosts, but nevertheless showed no host-discrimination. Furthermore, most wasps in the

527 Late treatment chose to oviposit on nearly-emerging non-parasitized hosts, while the parasitized host  
528 provided them with a small amount of lipids. Below, we further discuss temporal and nutritional  
529 interaction between both parasitoids, focusing on the role lipids.

530

#### 531 Competitive dominance depends on time of arrival

532 Sequential multiparasitism of a host by the two species is a form of direct resource scramble  
533 competition that affects reproductive success of both competitors. Several studies have shown that  
534 ectoparasitoids often win the competition with endoparasitoids, especially when the latter are in the  
535 early stages of development at the time of multiparasitism (Flanders 1971; Briggs 1993; Borer 2002).  
536 In line with previous studies, *N. vitripennis* outcompeted *T. zealandicus* in most of the broods in the  
537 Early treatment, hence the emergence success of *T. zealandicus* was strongly reduced compared to  
538 controls without *N. vitripennis* oviposition. In fact, the proportion of hosts from which *T. zealandicus*  
539 emerged as the sole species was roughly equal to the proportion of hosts that was not successfully  
540 parasitized by *N. vitripennis* in the control treatment (i.e. the proportion of host from which flies  
541 emerged). This suggests that at this stage of development *T. zealandicus* mostly profits from the lack  
542 of successful parasitism by *N. vitripennis*, albeit with strongly reduced brood weight. Scramble  
543 competition between parasitoids has been reported to lead to reduced individual mean body size  
544 (Slansky 1986; Harvey 2000; Duval et al. 2018), but no significant effects of competition on the size  
545 of emerging *N. vitripennis* were found in this treatment: the total amount of lipids acquired were  
546 similar between treatments and controls where the parasitoids did and did not experience competition.  
547 However, a significant negative effect for all fitness components was found in those few broods where  
548 both species emerged from the same host (i.e. host-sharing), which indicates that scramble competition  
549 did occur in some of the broods.

550

551 *T. zealandicus* was the only species to emerge in the Middle treatment, where *N. vitripennis* oviposited  
552 on hosts containing 10 day old *T. zealandicus* larvae at which time some host resources were still  
553 unconsumed. It is unclear what kind of interaction causes complete exclusion of *N. vitripennis*. At  
554 least 60% of *N. vitripennis* females were observed to have oviposited on the parasitized hosts in a  
555 separate verification experiment (data not shown). Borer (2002) found that the increased  
556 developmental stage of the first parasitoid had a negative effect on the success of the later-arriving  
557 parasitoid when both were parasitizing the same host. Furthermore, it is possible that *T. zealandicus*  
558 larvae at this stage of its development are less sensitive to the venom of *N. vitripennis*. The successful  
559 emergence of *T. zealandicus* suggests that the majority of their larvae are not lethally affected by the  
560 venom.

561

562 *N. vitripennis* only emerged from four hosts in the Late treatment, the stage when the 15 day old *T.*  
563 *zealandicus* already consumed the entire host. In all these cases, they emerged from hosts that also  
564 produced *T. zealandicus* offspring. The most plausible explanation is that *N. vitripennis* is capable of  
565 facultative hyperparasitism on these gregarious *T. zealandicus* larvae, as this is the sole possible  
566 resource for the larvae at this stage. The ability to hyperparasitize is known to be present in *N.*  
567 *vitripennis*: it was previously found to be a facultative hyperparasitoid on the solitary endoparasitoid  
568 *Alysia manducator* (Graham-Smith 1919; Altson 1920; Peters and Abraham 2010). A study by Harvey  
569 et al. (2011) showed a similar facultative shift in trophic level by *Gelis agilis*, a solitary secondary  
570 hyperparasitoid, when it encountered *Lysibia nana* in the host *Cotesia glomerata*. In this system,  
571 multiparasitism occurred if both species parasitized within 24 hours after each other. However, *G.*  
572 *agilis* switched to hyperparasitization when arriving 72 hours later than *L. nana*, facultatively  
573 increasing its trophic level. Here we find for two gregarious species that at an early stage  
574 multiparasitism occurs, and later *N. vitripennis* switches to facultatively hyperparasitizing on *T.*  
575 *zealandicus*.

576

#### 577 Compartmentalization of the host by *T. zealandicus* prevents spread of *N. vitripennis* venom

578 Why is *N. vitripennis* not able to utilize all of the resources contained in the *T. zealandicus* larvae by  
579 hyperparasitism? Prior to ovipositing eggs on any host, the *N. vitripennis* female will inject venom  
580 into the host which causes developmental arrest and results in a series of changes in the intermediary  
581 metabolism that could benefit the *N. vitripennis* development (Rivers and Denlinger 1995; Martinson  
582 et al. 2014; Mrinalini et al. 2015). After envenomation, the eggs are laid on the surface of the  
583 integument. The gregarious *T. zealandicus* effectively divide the hosts' resources into multiple (two to  
584 more than a hundred) compartments by consuming the entire host (Figure 6B). After removal of the  
585 host cocoon, the compartmentalization of the host by *T. zealandicus* larvae was observed to inhibit the  
586 diffusion of the venom throughout all available resources (Figure 7C). The envenomation site would  
587 therefore be the only potential site where the *N. vitripennis* larvae could obtain resources from *T.*  
588 *zealandicus*. These limitations of hyperparasitizing on *T. zealandicus* have consequences for *N.*  
589 *vitripennis*' fitness, as observed by the lower number of broods from which *N. vitripennis* emerged,  
590 the smaller brood size, the extended developmental time, and the offspring's reduced lipid levels.

591 Since *T. zealandicus* is shown here to have a lipid scavenging strategy like most other parasitoids  
592 (Visser et al. 2010), hyperparasitism will not benefit *N. vitripennis* in obtaining extra lipids, as the  
593 competitor does not produce any. If anything, the conversion cost into first *T. zealandicus*' tissue and  
594 then consumption by *N. vitripennis* is expected to reduce the available quantity of lipids. However,  
595 conversion efficiencies by hyperparasitoids of *Cotesia* are found to be surprisingly high (Harvey et al.  
596 2006, 2009, 2015, 2016). Moreover, both species are probably selected to catabolize lipids sparingly



597 in the adult stage, as they are both lipid scavengers. However, *N. vitripennis* emerging in the Late  
598 treatment had only half the lipid content of wasps in any other treatment.

599

#### 600 Mutual interference and facilitation in one interspecific interaction

601 In line with predictions, competition affected both parasitoid species negatively. This mutual  
602 interference was found in all treatments and especially in cases of host-sharing. Particularly in the Late  
603 treatment fitness of *N. vitripennis* was much lower. This may be due to a switch to hyperparasitizing  
604 on *T. zealandicus*, because conversion losses of resources accumulate with every additional trophic  
605 level. These apparent negative effects might seem like a deterrent for *N. vitripennis* to hyperparasitize  
606 on *T. zealandicus*. However, host-sharing also enhances host parasitism opportunities for *N.*  
607 *vitripennis* because the competitor's larvae provide an extension to the time window of host  
608 availability for *N. vitripennis*. *Calliphora vomitoria* hosts normally complete development and emerge  
609 on days 13-14 of the experiment, whereas hosts parasitized by *T. zealandicus* extend development to  
610 at least 15 days and possibly longer. In our experiment *N. vitripennis* females in the Late treatment  
611 were able to oviposit eggs on these old hosts parasitized by *T. zealandicus*, and they successfully  
612 emerged, albeit in low numbers. In summary, the presence of *T. zealandicus* facilitates *N. vitripennis*  
613 under these specific circumstances, allowing a longer window of host availability for  
614 hyperparasitization. Although successful hyperparasitization occurred only rarely in our experiments,  
615 it is highly beneficial when no other hosts are available: A bad host is better than none at all. In the  
616 wild, *N. vitripennis* might adapt to the presence of the introduced *T. zealandicus* by improved abilities  
617 to hyperparasitize.

618

#### 619 A mismatch between host preference and offspring performance

620 One of the aims of this study was to investigate whether *N. vitripennis* prefers unparasitized over hosts  
621 previously parasitized by *T. zealandicus*, in order to avoid competition for limited (host) resources. *N.*  
622 *vitripennis* appears to be unable to use external cues for measuring host quality (King and Rafai 1970;  
623 Rivers et al. 2012), but probing host tissues by ovipositor drilling allows *N. vitripennis* to discriminate  
624 between dead and healthy hosts (Wylie 1958), between non-parasitized hosts and hosts parasitized by  
625 other *Nasonia* species (Ivens et al. 2009), and between hosts parasitized by conspecifics and other  
626 pupal parasitoids (Wylie 1971; Rivers 1996). Our results show that *N. vitripennis* does not  
627 discriminate between parasitized and non-parasitized hosts in the Early and Middle treatments. Only in  
628 the Late treatment did the females oviposit on the non-parasitized host significantly more often than  
629 expected by random choice. This suggests that *N. vitripennis* can only detect the *T. zealandicus* larvae  
630 when they are starting to pupate and the host tissue has been completely consumed. In the Early  
631 treatment there was a marginally significant preference to land first on the parasitized host. In the other  
632 treatments the first landing was random. This suggests that *N. vitripennis* is not capable to determine

633 the host quality from a distance. However, after drilling into the parasitized hosts a higher proportion  
634 of *N. vitripennis* moved to the other host in the Early and Late treatment. Crucially, this is also the  
635 time that wasps form associative memories between characteristics of the environment and oviposition  
636 rewards (Hoedjes et al. 2014). In the Early treatment, first landing was biased to parasitized hosts, but  
637 final choice for oviposition was 50:50. And although first landing was random in the Late treatment,  
638 more wasps oviposited on non-parasitized hosts (note that these hosts were about to emerge as flies).

639

640 Host preference and offspring performance are predicted to co-evolve in order to maximize offspring  
641 fitness (Jaenike 1978; Cusumano et al. 2016). However, in the case of interaction with a nonnative  
642 species there may not have been sufficient time to optimize the behaviors. *Tachinaephagus*  
643 *zealandicus* was introduced from Australia into Denmark in 1970 as a (unsuccessful) biocontrol agent  
644 against house flies (Geden and Skovgård 2014), while *N. vitripennis* is native in Europe. This leads to  
645 an important question: Is 45 years of co-evolutionary interaction enough time for selection to optimize  
646 behavioral responses to an invader? The host flies are already attacked by a range of other parasitoid  
647 species of the genera *Aphaereta*, *Alysia*, *Muscidifurax*, *Spalangia*, *Trichopria*, and others (Frederickx  
648 et al. 2013; Mitroiu 2013; van Achterberg et al. 2020). Considering the presence of so many different  
649 species attacking the same fly hosts, it is likely that *N. vitripennis* evolved adaptations to cope with  
650 interspecific competition. These may be coopted as exaptations in its interaction with *T. zealandicus*.

651 In our study, we found a mismatch between *N. vitripennis* host preference and offspring performance  
652 in two out of three scenarios, which suggests that these species have not had sufficient time of co-  
653 evolutionary interaction to optimize behaviors. Depending on the frequency with which interactions  
654 between species occur in nature, *N. vitripennis* might evolve to become more effective in  
655 hyperparasitizing gregarious endoparasitoids in a highly competitive environment, for example in  
656 areas with high *T. zealandicus* densities. This experiment is currently being carried out in nature, as  
657 both species spread globally and have already been found co-occurring at the same sites on four  
658 different continents (Gold and Dahlsten 1981; Bishop et al. 1996; Oliva 2008; Frederickx et al. 2013)

659

#### 660 Measuring lipids acquisition in ecological interactions of lipid scavengers

661 In this study we unravel a competitive interaction between two species of parasitoid wasps. In addition  
662 to successful emergence of offspring, we also studied lipid acquisition as the main currency of the  
663 interaction. We propose to look beyond survival and body mass as measures of fitness in future  
664 studies. Specifically, we suggest to focus on nutrients that are limiting in the examined ecological  
665 interaction (Richard and de Roos 2018). Here were presented an example of two species of parasitoid  
666 insects that are lipid scavengers and are thereby intrinsically limited in lipids. By quantifying fitness as  
667 lipids acquired we found differences between treatments that may otherwise have been missed, for  
668 example in treatments where brood sizes of *N. vitripennis* were similar, or where two fitness proxies

669 indicated opposite effects. Measurements on the flow of specific nutrients are expected to be helpful in  
670 every system where prior knowledge is available on such nutrient limitation (e.g. Wilder et al. 2013;  
671 Herren et al. 2014; Paredes et al. 2016; Keymer and Gutjahr 2018).

672

### 673 **Acknowledgements**

674 Natalie Wagner provided a helping hand during a crucial point of the competition experiments. Robin  
675 van der Slikke performed several of the choice tests as part of a high school assignment. Jitte  
676 Groothuis is thanked for the photography of both parasitoid wasp species. This work was supported by  
677 a grant from The Netherlands Organization for Scientific Research [NWO, VICI grant number  
678 865.12.003].

679

### 680 **References**

- 681 Abell, K. J., R. Gwiazdowski, B. B. Normark, N. Kamata, and R. G. Van Driesche. 2016. The scale  
682 and parasitoid community on native hemlocks in Japan. *Biol. Control* 100:7–17. Elsevier Inc.
- 683 Ables, J. 1977. Occurrence of an imported fly parasite, *Tachinaephagus zealandicus* Ashmead  
684 (Hymenoptera: Encyrtidae) in South Carolina. *J. Georg. Entomol. Soc.* 12:114–117.
- 685 Altson, A. M. 1920. The Life-History and Habits of two Parasites of Blowflies. *Proc. Zool. Soc.*  
686 London 15:195–243.
- 687 Bishop, D. M., A. C. G. Heath, and N. A. Haack. 1996. Distribution, prevalence and host associations  
688 of Hymenoptera parasitic on Calliphoridae occurring in flystrike in New Zealand. *Med. Vet.*  
689 *Entomol.* 10:365–370.
- 690 Borer, E. T. 2002. Intraguild predation in larval parasitoids: implications for coexistence. *J. Anim.*  
691 *Ecol.* 71:957–965.
- 692 Briggs, C. J. 1993. Competition Among Parasitoid Species on a Stage-Structured Host and Its Effect  
693 on Host Suppression. *Am. Nat.* 141:372–397.
- 694 Burr, G. O., M. M. Burr, and E. S. Miller. 1932. On the fatty acids essential in nutrition. III. *J. Biol.*  
695 *Chem.* 97:1–9.
- 696 Carvalho, A. R. de, J. M. D’Almeida, and R. P. de Mello. 2004. Mortalidade de Larvas e Pupas de  
697 *Chrysomya megacephala* (Fabricius) (Diptera: Calliphoridae) e seu Parasitismo por  
698 Microhimenópteros na Cidade do Rio de Janeiro, RJ [Mortality of Larvae and Pupae of  
699 *Chrysomya megacephala* (Fabricius) (Diptera: Calliphoridae). *Neotrop. Entomol.* 33:505–509.
- 700 Cusumano, A., E. Peri, and S. Colazza. 2016. Interspecific competition/facilitation among insect  
701 parasitoids. *Curr. Opin. Insect Sci.* 14:12–16.
- 702 David, J., Y. Cohet, and P. Fouillet. 1975. Physiologie de l’inanition et utilisation de reserves les  
703 adultes de *Drosophila melanogaster*. *Arch. Zool. Exp. Gen.* 116:579–590.
- 704 Duval, J. F., J. Brodeur, J. Doyon, and G. Boivin. 2018. Impact of superparasitism time intervals on

- 705 progeny survival and fitness of an egg parasitoid. *Ecol. Entomol.* 43:310–317.
- 706 Edwards, R. L. 1954. The effect of diet on egg maturation and resorption in *Mormoniella vitripennis*  
707 (Hymenoptera, Pteromalidae). *Q. J. Microsc. Sci.* 95:459–468.
- 708 Ellers, J. 1996. Fat and eggs: An alternative method to measure the trade-off between survival and  
709 reproduction in insect parasitoids. *Netherlands J. Zool.* 46:227–235.
- 710 Ellers, J., E. T. Kiers, C. R. Currie, B. R. McDonald, and B. Visser. 2012. Ecological interactions  
711 drive evolutionary loss of traits. *Ecol. Lett.* 15:1071–1082.
- 712 Elzinga, J. A., K. Zwakhals, J. A. Harvey, and A. Biere. 2007. The parasitoid complex associated with  
713 the herbivore *Hadena bicruris* (Lepidoptera: Noctuidae) on *Silene latifolia* (Caryophyllaceae) in  
714 the Netherlands. *J. Nat. Hist.* 41:101–123.
- 715 Ferreira de Almeida, M. A., A. P. do Prado, and C. J. Geden. 2002. Influence of temperature on  
716 development time and longevity of *Tachinaephagus zealandicus* (Hymenoptera: Encyrtidae), and  
717 effects of nutrition and emergence order on longevity. *Environ. Entomol.* 31:375–380.
- 718 Flanders, S. E. 1971. Multiple parasitism of Armored Coccids (Homoptera) by host-regulative  
719 Aphelinids (Hymenoptera); ectoparasites versus endoparasites. *Can. Entomol.* 103:857–872.
- 720 Frederickx, C., J. Dekeirsschieter, F. J. Verheggen, and E. Haubruge. 2013. The community of  
721 Hymenoptera parasitizing necrophagous Diptera in an urban biotope. *J. Insect Sci.* 13:1–14.
- 722 Gause, G. F. 1934. *The struggle for existence*. The Williams & Wilkins company, Baltimore,.
- 723 Geden, C. J., and H. Skovgård. 2014. Status of *Tachinaephagus zealandicus* (Hymenoptera:  
724 Encyrtidae), a larval parasitoid of muscoid flies, in the U.S. and Denmark. *J. Vector Ecol.*  
725 39:453–456.
- 726 Giron, D., and J. Casas. 2003. Lipogenesis in an adult parasitic wasp. *J. Insect Physiol.* 49:141–147.
- 727 Godfray, H. C. J. 1994. *Parasitoids - Behavioral and evolutionary ecology*. Princeton University Press,  
728 Princeton, NJ.
- 729 Gold, C., and D. Dahlsten. 1981. A new host record for *Tachinaephagus zealandicus* [Hym.:  
730 Encyrtidae]. *Entomophaga* 26:459–460.
- 731 Graham-Smith, G. S. 1919. Further Observations on the Habits and Parasites of Common Flies.  
732 *Parasitology* 11:347–384.
- 733 Harvey, J. A. 2000. Dynamic effects of parasitism by an endoparasitoid wasp on the development of  
734 two host species: Implications for host quality and parasitoid fitness. *Ecol. Entomol.* 25:267–278.
- 735 Harvey, J. A. 2005. Factors affecting the evolution of development strategies in parasitoid wasps: The  
736 importance of functional constraints and incorporating complexity. *Entomol. Exp. Appl.* 117:1–  
737 13.
- 738 Harvey, J. A., M. Fei, M. Lammers, M. Kos, F. Zhu, R. Heinen, E. H. Poelman, and R. Gols. 2016.  
739 Development of a solitary koinobiont hyperparasitoid in different instars of its primary and  
740 secondary hosts. *J. Insect Physiol.* 90:36–42.

- 741 Harvey, J. A., R. Gols, H. Snaas, M. Malcicka, and B. Visser. 2015. Host preference and offspring  
742 performance are linked in three congeneric hyperparasitoid species. *Ecol. Entomol.* 40:114–122.
- 743 Harvey, J. A., F. Pashalidou, R. Soler, and T. M. Bezemer. 2011. Intrinsic competition between two  
744 secondary hyperparasitoids results in temporal trophic switch. *Oikos* 120:226–233.
- 745 Harvey, J. A., E. H. Poelman, and T. Tanaka. 2013. Intrinsic Inter- and Intraspecific Competition in  
746 Parasitoid Wasps. *Annu. Rev. Entomol.* 58:333–351.
- 747 Harvey, J. A., L. E. M. Vet, L. M. A. Witjes, and T. M. Bezemer. 2006. Remarkable similarity in body  
748 mass of a secondary hyperparasitoid *Lysibia nana* and its primary parasitoid host *Cotesia*  
749 *glomerata* emerging from cocoons of comparable size. *Arch. Insect Biochem. Physiol.* 61:170–  
750 183.
- 751 Harvey, J. A., R. Wagenaar, and T. M. Bezemer. 2009. Interactions to the fifth trophic level:  
752 Secondary and tertiary parasitoid wasps show extraordinary efficiency in utilizing host resources.  
753 *J. Anim. Ecol.* 78:686–692.
- 754 Herren, J. K., J. C. Paredes, F. Schüpfer, K. Arafah, P. Bulet, and B. Lemaitre. 2014. Insect  
755 endosymbiont proliferation is limited by lipid availability. *Elife* 3:e02964.
- 756 Hoedjes, K. M., L. E. M. Kralemann, J. J. F. A. van Vugt, L. E. M. Vet, and H. M. Smid. 2014.  
757 Unravelling reward value: the effect of host value on memory retention in *Nasonia* parasitic  
758 wasps. *Anim. Behav.* 96:1–7.
- 759 Ivens, A. B. F., D. M. Shuker, L. W. Beukeboom, and I. Pen. 2009. Host acceptance and sex allocation  
760 of *Nasonia* wasps in response to conspecifics and heterospecifics. *Proc. R. Soc. B Biol. Sci.*  
761 276:3663–3669.
- 762 Jaenike, J. 1978. On optimal oviposition behavior in phytophagous insects. *Theor. Popul. Biol.*  
763 14:350–356.
- 764 Keymer, A., and C. Gutjahr. 2018. Cross-kingdom lipid transfer in arbuscular mycorrhiza symbiosis  
765 and beyond. *Curr. Opin. Plant Biol.* 44:137–144.
- 766 King, P. E., and J. Rafai. 1970. Host discrimination in a gregarious parasitoid *Nasonia vitripennis*  
767 (Walker) (Hymenoptera: Pteromalidae). *J. Exp. Biol.* 53:245–254.
- 768 Kostenko, O., M. Lammers, S. Grootemaat, T. Kroon, J. A. Harvey, M. Van Geem, and T. Martijn  
769 Bezemer. 2015. Effects of plant diversity and structural complexity on parasitoid behaviour in a  
770 field experiment. *Ecol. Entomol.* 40:748–758.
- 771 Lahti, D. C., N. A. Johnson, B. C. Ajie, S. P. Otto, A. P. Hendry, D. T. Blumstein, R. G. Coss, K.  
772 Donohue, and S. A. Foster. 2009. Relaxed selection in the wild. *Trends Ecol. Evol.* 24:487–496.
- 773 Luginbuehl, L. H., G. N. Menard, S. Kurup, H. Van Erp, G. V Radhakrishnan, A. Breakspear, G. E. D.  
774 Oldroyd, and P. J. Eastmond. 2017. Fatty acids in arbuscular mycorrhizal fungi are synthesized  
775 by the host plant. *Science* (80-. ). 356:1175–1178.
- 776 Martinson, E. O., D. Wheeler, J. Wright, Mrinalini, A. L. Siebert, and J. H. Werren. 2014. *Nasonia*

- 777 *vitripennis* venom causes targeted gene expression changes in its fly host. *Mol. Ecol.* 23:5918–  
778 5930.
- 779 Mazumdar, J., and B. Striepen. 2007. Make it or take it: Fatty acid metabolism of apicomplexan  
780 parasites. *Eukaryot. Cell* 6:1727–1735.
- 781 Mitroiu, M.-D. 2013. A review of the Pteromalidae (Hymenoptera: Chalcidoidea) parasitizing  
782 synanthropic flies in Romania. *Analele Științifice ale Univ. “Al I Cuza” din Iași. (Serie Nouă)*  
783 *Secțiunea I Biol. Anim.* 59:147–151.
- 784 Moreau, D., R. D. Bardgett, R. D. Finlay, D. L. Jones, and L. Philippot. 2019. A plant perspective on  
785 nitrogen cycling in the rhizosphere. *Funct. Ecol.* 33:540–552.
- 786 Mrinalini, A. L. Siebert, J. Wright, E. Martinson, D. Wheeler, and J. H. Werren. 2015. Parasitoid  
787 venom induces metabolic cascades in fly hosts. *Metabolomics* 11:350–366.
- 788 Oishi, M., and H. Sato. 2008. Guild structure and coexistence mechanisms in the parasitoid  
789 assemblage associated with a leafminer, *Coptotriche japoniella* (Lepidoptera, Tischeriidae), on  
790 an evergreen tree, *Eurya japonica* (Theaceae). *Environ. Entomol.* 37:1231–1240.
- 791 Oliva, A. 2008. Parasitoid wasps (Hymenoptera) from puparia of sarcosaprophagous flies (Diptera:  
792 Calliphoridae; Sarcophagidae) in Buenos Aires, Argentina *NOTA CIENTÍFICA. Rev. la Soc.*  
793 *Entomológica Argentina* 67:3–4.
- 794 Olton, G. S., and E. F. Legner. 1974. Biology of *Tachinaephagus zealandicus* (Hymenoptera:  
795 Encyrtidae), parasitoid of synanthropic Diptera. *Can. Entomol.* 106:785–800.
- 796 Paredes, J. C., J. K. Herren, F. Schüpfer, and B. Lemaitre. 2016. The Role of Lipid Competition for  
797 Endosymbiont-Mediated Protection against Parasitoid Wasps in *Drosophila*. *MBio* 7:1–8.
- 798 Peters, R. 2010. Host range and offspring quantities in natural populations of *Nasonia vitripennis*  
799 (Walker, 1836) (Hymenoptera: Chalcidoidea:Pteromalidae). *J. Hymenopt. Res.* 19:128–138.
- 800 Peters, R. S. 2014. First record of the parasitoid wasp *Tachinaephagus zealandicus* Ashmead, 1904  
801 (Hymenoptera: Chalcidoidea: Encyrtidae) in Germany. *Bonn Zool. Bull.* 63:115–118.
- 802 Peters, R. S., and R. Abraham. 2010. The food web of parasitoid wasps and their non-phytophagous  
803 fly hosts in birds' nests (Hymenoptera: Chalcidoidea, and Diptera: Cyclorrhapha). *J. Nat. Hist.*  
804 44:625–638.
- 805 Prager, L., A. Bruckmann, and J. Ruther. 2019. De novo biosynthesis of fatty acids from  $\alpha$ -D-glucose  
806 in parasitoid wasps of the *Nasonia* group. *Insect Biochem. Mol. Biol.* 115:103256. Elsevier.
- 807 Price, P. W. 1972. Parasitoids Utilizing the Same Host : Adaptive Nature of Differences in Size and  
808 Form. *Ecology* 53:190–195.
- 809 R Development Core Team. 2015. R: A language and environment for statistical computing.
- 810 Richard, R., and A. M. de Roos. 2018. The impact of development on patterns of nutrient limitation.  
811 *Funct. Ecol.* 32:1507–1519.
- 812 Rivero, A., and S. A. West. 2002. The physiological costs of being small in a parasitic wasp. *Evol.*



- 813 Ecol. Res. 4:407–420.
- 814 Rivers, D. B. 1996. Changes in Oviposition Behavior of the Ectoparasitoids *Nasonia vitripennis* and  
815 *Muscidifurax zaraptor* (Hymenoptera: Pteromalidae) When Using Different Species of Fly  
816 Hosts, Prior Oviposition Experience, and Allospecific Competition. *Ann. Entomol. Soc. Am.*  
817 89:466–474.
- 818 Rivers, D. B., and D. L. Denlinger. 1994. Developmental fate of the flesh fly, *Sarcophaga bullata*,  
819 envenomated by the pupal ectoparasitoid, *Nasonia vitripennis*. *J. Insect Physiol.* 40:121–127.
- 820 Rivers, D. B., and D. L. Denlinger. 1995. Venom-Induced Alterations in Fly Lipid Metabolism and Its  
821 Impact on Larval Development of the Ectoparasitoid *Nasonia vitripennis* (Walker)  
822 (Hymenoptera: Pteromalidae). *J. Invertebr. Pathol.* 66:104–110.
- 823 Rivers, D. B., A. Kaikis, D. Bulanowski, T. Wigand, and R. Brogan. 2012. Oviposition Restraint and  
824 Developmental Alterations in the Ectoparasitic Wasp, *Nasonia vitripennis*, When Utilizing  
825 Puparia Resulting From Different Size Maggot Masses of *Lucilia illustris*, *Protophormia*  
826 *terraenovae*, and *Sarcophag*. *J. Med. Entomol.* 49:1124–1136.
- 827 Schwelm, A., J. Fogelqvist, A. Knaust, S. Jülke, T. Lilja, G. Bonilla-Rosso, M. Karlsson, A.  
828 Shevchenko, V. Dhandapani, S. R. Choi, H. G. Kim, J. Y. Park, Y. P. Lim, J. Ludwig-Müller,  
829 and C. Dixelius. 2015. The *Plasmodiophora brassicae* genome reveals insights in its life cycle  
830 and ancestry of chitin synthases. *Sci. Rep.* 5:1–12.
- 831 Sequeira, R., and M. Mackauer. 1992. Nutritional ecology of an insect host-parasitoid association: The  
832 pea aphid-*Aphidius ervi* system. *Ecology* 73:183–189.
- 833 Šigut, M., H. Šigutová, J. Šipoš, P. Pyszko, N. Kotásková, and P. Drozd. 2018. Vertical canopy  
834 gradient shaping the stratification of leaf-chewer–parasitoid interactions in a temperate forest.  
835 *Ecol. Evol.* 8:7297–7311.
- 836 Slansky, F. 1986. Nutritional ecology of endoparasitic insects and their hosts: An overview. *J. Insect*  
837 *Physiol.* 32:255–261.
- 838 Stuart Chapin, F., P. A. Matson, and P. M. Vitousek. 2012. Principles of terrestrial ecosystem ecology.
- 839 Subba Rao, B. 1978. A revision of *Tachinaephagus* Ashmead (Hymenoptera: Encyrtidae) with  
840 descriptions of four new species. *Bull. Entomol. Res.* 68:65–73.
- 841 Sullivan, D. J., and W. Völkl. 1999. HYPERPARASITISM: Multitrophic Ecology and Behavior.  
842 *Annu. Rev. Entomol.* 44:291–315.
- 843 Tilman, D. 1982. Resource competition and community structure. *Monogr. Popul. Biol.* 17:1–296.
- 844 Turchetto, M., and S. Vanin. 2004. Forensic evaluations on a crime case with monospecific  
845 necrophagous fly population parasitoid species. *Anil Aggrawal's Internet J. Forensic Med.*  
846 *Toxicol.* 5:12–18.
- 847 van Achterberg, K., M. Schilthuizen, M. Lammers, M. van der Meer, R. Delval, C. Dias, M. Hoyneck,  
848 H. Köster, R. Maarschall, N. Peeters, P. Venema, R. Zaremba, C. Beltrami, F. Nieuwenhuis, N.

- 849 de Rop, I. Njunjić, and J. Koene. 2020. A new parasitoid wasp, *Aphaereta vondelparkensis* sp. n.  
850 (Braconidae, Alysiinae), from a city park in the centre of Amsterdam. Biodivers. Data J.  
851 8:e49017.
- 852 van Velzen, E., S. Pérez-Vila, and R. S. Etienne. 2016. The role of within-host competition for  
853 coexistence in multiparasitoid-host systems. Am. Nat. 187:48–59.
- 854 Vinson, S. B., and G. F. Iwantsch. 1980. Host Suitability for Insect Parasitoids. Annu. Rev. Entomol.  
855 25:397–419.
- 856 Visser, B., and J. Ellers. 2008. Lack of lipogenesis in parasitoids: A review of physiological  
857 mechanisms and evolutionary implications. J. Insect Physiol. 54:1315–1322.
- 858 Visser, B., C. Le Lann, F. J. den Blanken, J. A. Harvey, J. J. M. van Alphen, J. Ellers, and Visser.  
859 2010. Loss of lipid synthesis as an evolutionary consequence of a parasitic lifestyle. Proc. Natl.  
860 Acad. Sci. 107:8677–8682.
- 861 Visser, B., D. Roelofs, D. A. Hahn, P. E. A. Teal, J. Mariën, and J. Ellers. 2012. Transcriptional  
862 changes associated with lack of lipid synthesis in parasitoids. Genome Biol. Evol. 4:864–874.
- 863 Voss, S. C., H. Spafford, and I. R. Dadour. 2009. Hymenopteran parasitoids of forensic importance:  
864 host associations, seasonality, and prevalence of parasitoids of carrion flies in Western Australia.  
865 J. Med. Entomol. 46:1210–1219.
- 866 Whiting, A. R. 1967. The Biology of the Parasitic Wasp *Mormoniella vitripennis* [= *Nasonia*  
867 *brevicornis*] (Walker). Q. Rev. Biol. 42:333–406.
- 868 Wilder, S. M., M. Norris, R. W. Lee, D. Raubenheimer, and S. J. Simpson. 2013. Arthropod food  
869 webs become increasingly lipid-limited at higher trophic levels. Ecol. Lett. 16:895–902.
- 870 Wylie, H. G. 1958. Factors That Affect Host Finding by *Nasonia vitripennis* (Walk.) (Hymenoptera:  
871 Pteromalidae). Can. Entomol. 90:597–608.
- 872 Wylie, H. G. 1971. Observations on intraspecific larval competition in three Hymenopterous parasites  
873 of fly puparia. Can. Entomol. 103:137–142.
- 874 Xu, J., C. W. Saunders, P. Hu, R. A. Grant, T. Boekhout, E. E. Kuramae, J. W. Kronstad, Y. M.  
875 DeAngelis, N. L. Reeder, K. R. Johnstone, M. Leland, A. M. Fieno, W. M. Begley, Y. Sun, M. P.  
876 Lacey, T. Chaudhary, T. Keough, L. Chu, R. Sears, B. Yuan, T. L. Dawson, and Xu. 2007.  
877 Dandruff-associated *Malassezia* genomes reveal convergent and divergent virulence traits shared  
878 with plant and human fungal pathogens. Proc. Natl. Acad. Sci. 104:18730–18735.
- 879 Zhu, F., M. Lammers, J. A. Harvey, and E. H. Poelman. 2016. Intrinsic competition between primary  
880 hyperparasitoids of the solitary endoparasitoid *Cotesia rubecula*. Ecol. Entomol. 41:292–300.  
881
